# Supplementary material for: Novel PET-pperated rosamine pH-sensor dyes with substitution pattern-tunable pKa values and temperature sensitivity
Source: Royal Society of Chemistry journal article supplement (doi:10.1039/d1nj02505h), 2021-01-01
Supplement: d1nj02505h1.pdf [file d1nj02505h1.pdf]

Electronic Supplementary Information (ESI)

## **Novel PET-Operated Rosamine Sensor Dyes with Substitution Pattern-Tunable pKa Values and Temperature Sensitivity**

Elina Andresen,<sup>a,b</sup> Sebastian Radunz,<sup>a</sup> and Ute Resch-Genger<sup>a,\*</sup>

<sup>a</sup> *Federal Institute for Materials Research and Testing, Richard-Willstaetter-Str. 11, 12489 Berlin, Germany*

<sup>b</sup> *Humboldt-Universitaet zu Berlin, Department of Chemistry, Brook-Taylor-StraÙe 2, 12489 Berlin, Germany*

### **Content:**

- 1. Data and Spectra from Optical Spectroscopy**
- 2. Data and Spectra from Optical Spectroscopy**
  - 2.1. Absorption and emission spectra of the pH-titration**
  - 2.2. pH-titration curves of dye 1c at 20°C and 40°C**
  - 2.3. Absorption and emission spectra of the temperature dependence**
  - 2.4. Fluorescence decay curves**
- 3. NMR spectra (<sup>1</sup>H and <sup>13</sup>C)**
- 4. MS spectra**
- 5. References**

## 1. Synthetic procedure

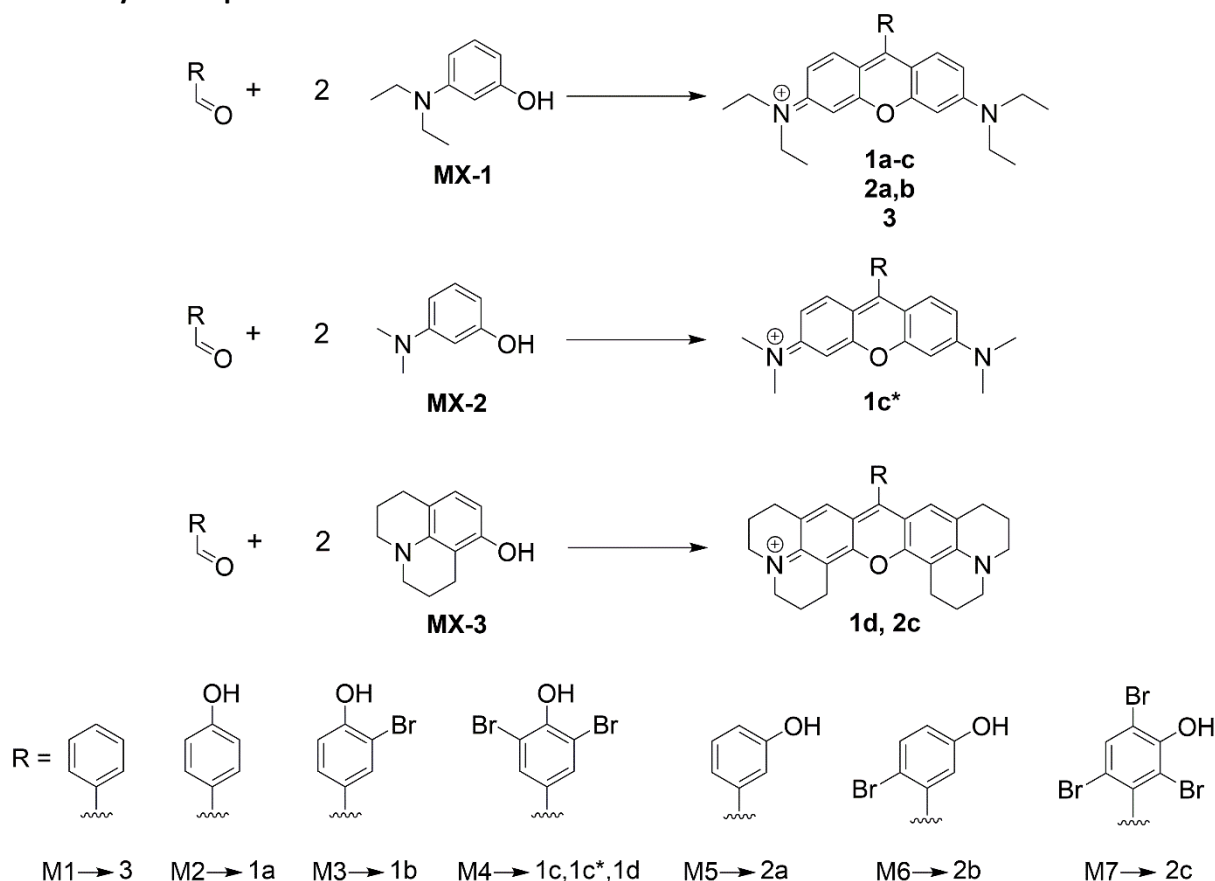

Figure S1: Synthetic route of rosamine dyes.

Reaction conditions: 1) 0.15 eq *p*-TsOH, propionic acid, 80°C, 2h; 2) 1.1 eq chloranil, rt, 12h.

Synthesis of mono-, di-, and tri-bromo-substituted hydroxybenzaldehyde compounds **M3**, **M4**, **M6** and **M7** are described in a previous work.<sup>1</sup>

Rosamines **1a-d**, **2a-c** and **3** were synthesized using differently substituted benzaldehyde derivatives **M1-M7** and the commercially available compounds **MX-1-3**, following the general procedure outlined in Scheme S1. To obtain the desired products in sufficient purity, it was necessary to run several columns (at least 2), followed by extraction with NaCl solution to remove residue propionic acid.

To a solution of the corresponding aldehyde **M1-M7** (1.0 mmol, 1.0 eq.) in 15 mL propanoic acid 3-diethylaminophenol (**MX-1**), 3-dimethylaminophenol (**MX-2**), or 8-hydroxyjulolidine (**MX-3**) (2.0 mmol, 1.5 eq.) and *p*-TsOH (0.15 mmol, 0.15 eq., 26 mg) were added. The solution was protected from light and stirred at 80°C for 2 h. After cooling to room temperature (rt), chloranil (1.5 mmol, 1.5 eq., 370 mg) was added to the reaction mixture that was then stirred overnight at rt. The resulting dark purple solution was evaporated to dryness and the crude product was purified by column chromatography on silica gel (DCM/MeOH, 98/2 to 90/10). The fraction containing the desired product were combined, concentrated and extracted with NaCl solution to yield the desired compound as a purple or violet solid.

Data for **1a**: Compound **1a** was synthesized according to the procedure mentioned above using **M2** (122.5 mg) and **MX-1** (331.3 mg) as precursors. Purification by column chromatography on silica gel using DCM/MeOH (98/2 to 90/10) as eluent gave compound **1a** as violet solid (114.1 mg, 27%).

<sup>1</sup>H-NMR (500 MHz, CD<sub>3</sub>OD): δ = 1.31 (t, J = 7.1Hz, 12H), 3.68 (q, J = 7.1Hz, 8H), 6.95 (d, J = 2.4Hz, 2H), 7.08 (m, 4H), 7.33 (d, J = 8.5Hz, 2H), 7.52 (d, J = 9.6Hz, 2H) ppm.

$^{13}\text{C}$ (125MHz,  $\text{CD}_3\text{OD}$ )  $\delta$  = 11.51, 45.46, 96.02, 113.19, 113.92, 115.50, 122.64, 131.53, 132.10, 155.66, 158.28, 158.40, 159.87 ppm.

MS (ESI-TOF) m/z calculated for  $[\text{M}]^+$  415.2380; Found  $[\text{M}]^+$ : 415.2399.

Data for **1b**: Compound **1b** was synthesized according to the procedure mentioned above using **M3** (201.3 mg) and **MX-1** (331.1 mg) as precursors. Purification by column chromatography on silica gel using DCM/MeOH (98/2 to 90/10) as eluent gave compound **1b** as violet solid (101.2 mg, 20 %).

$^1\text{H}$ -NMR (500 MHz,  $\text{CD}_3\text{OD}$ ):  $\delta$  = 1.32 (t, J = 7.1Hz, 12H), 3.69 (q, J = 7.1Hz, 8H), 6.96 (d, J = 2.5Hz, 2H), 7.10 (dd,  $^1\text{J}$  = 9.6Hz,  $^2\text{J}$  = 2.5Hz, 2H), 7.16 (d, J = 8.3Hz, 1H), 7.31 (dd,  $^1\text{J}$  = 8.3Hz,  $^2\text{J}$  = 2.1Hz, 1H), 7.48 (d, J = 9.6Hz, 2H); 7.62 (d, J = 2.1Hz, 1H) ppm.

$^{13}\text{C}$  (125MHz,  $\text{CD}_3\text{OD}$ )  $\delta$  = 11.48, 45.48, 96.06, 110.37, 113.16, 114.12, 116.25, 123.79, 130.39, 131.75, 134.26, 155.72, 156.31, 156.88, 158.23 ppm.

MS (ESI-TOF) m/z calculated for  $[\text{M}]^+$  493.1485; Found  $[\text{M}]^+$ : 493.1552.

Data for **1c**: Compound **1c** was synthesized according to the procedure mentioned above using **M4** (280 mg) and **MX-1** (330 mg) as precursors. Purification by column chromatography on silica gel using DCM/MeOH (98/2 to 90/10) as eluent gave compound **1c** as violet solid (93 mg, 16 %).

$^1\text{H}$ -NMR (500 MHz,  $\text{CD}_3\text{OD}$ ):  $\delta$  = 1.36 (t, J = 7.1Hz, 12H), 3.74 (q, J = 7.1Hz, 8H), 7.02 (d, J = 2.4Hz, 2H), 7.17 (dd,  $^1\text{J}$  = 9.6Hz,  $^2\text{J}$  = 2.4Hz, 2H), 7.48 (d, J = 9.6Hz, 2H), 7.70 (s, 2H) ppm.

$^{13}\text{C}$ (125MHz,  $\text{CD}_3\text{OD}$ )  $\delta$  = 13.10, 47.16, 97.74, 113.03, 114.89, 116.02, 116.10, 127.26, 133.08, 134.90, 154.71, 155.94, 157.51, 157.54, 159.87 ppm.

MS (ESI-TOF) m/z calculated for  $[\text{M}]^+$  573.0570; Found  $[\text{M}]^+$ : 573.0600.

Data for **1c\***: Compound **1c\*** was synthesized according to the procedure mentioned above using **M4** (281.1 mg) and **MX-2** (275.5 mg) as precursors. Purification by column chromatography on silica gel using DCM/MeOH (98/2 to 90/10) as eluent gave compound **1c\*** as violet solid (101.9 mg, 19 %).

$^1\text{H}$ -NMR (500 MHz,  $\text{CD}_3\text{OD}$ ):  $\delta$  = 3.37 (s, 12H), 7.02 (d, J = 2.5Hz, 2H), 7.17 (dd,  $^1\text{J}$  = 9.5Hz,  $^2\text{J}$  = 2.5Hz, 2H), 7.49 (d, J = 9.5Hz, 2H), 7.69 (s, 2H) ppm.

$^{13}\text{C}$  (125MHz,  $\text{CD}_3\text{OD}$ )  $\delta$  = 39.61, 96.29, 111.38, 113.36, 114.45, 125.61, 131.14, 133.28, 153.10, 154.97, 157.68, 158.00 ppm.

MS (ESI-TOF) m/z calculated for  $[\text{M}]^+$  516.9944; Found  $[\text{M}]^+$ : 516.9935.

Data for **1d**: Compound **1d** was synthesized according to the procedure mentioned above using **M4** (152.8 mg) and **MX-3** (206 mg) as precursors. Purification by column chromatography on silica gel using DCM/MeOH (98/2 to 90/10) as eluent gave compound **1d** as violet solid (56.3 mg, 18 %).

$^1\text{H}$ -NMR (500 MHz,  $\text{CD}_3\text{OD}$ ):  $\delta$  = 1.97 (t, J = 5.3Hz, 4H), 2.10 (t, J = 5.3Hz, 4H), 2.75 (t, J = 5.7Hz, 4H), 3.05 (t, J = 6.0Hz, 4H), 3.53 (t, J = 5.3Hz, 4H), 3.56 (t, J = 5.3Hz, 4H), 6.87 (s, 2H), 7.51 (s, 2H) ppm.

$^{13}\text{C}$  (125MHz,  $\text{CD}_3\text{OD}$ )  $\delta$  = 19.49, 19.64, 20.46, 27.27, 50.08, 50.59, 105.41, 111.37, 112.68, 124.26, 125.93, 126.16, 132.99, 151.24, 151.37, 152.25, 152.79 ppm.

MS (ESI-TOF) m/z calculated for  $[\text{M}]^+$  621.0570; Found  $[\text{M}]^+$ : 621.0671.

Data for **2a**: Compound **2a** was synthesized according to the procedure mentioned above using **M5** (122.5 mg) and **MX-1** (331.5 mg) as precursors. Purification by column chromatography on silica gel using DCM/MeOH (98/2 to 90/10) as eluent gave compound **2a** as violet solid (112.1 mg, 27 %).

$^1\text{H}$ -NMR (500 MHz,  $\text{CD}_3\text{OD}$ ):  $\delta$  = 1.31 (t, J = 7.1Hz, 12H), 3.68 (q, J = 7.1Hz, 8H), 6.87 (m, 1H), 6.89 (d, J = 7.6Hz, 1H), 6.95 (s, 2H), 7.07 (m, 3H), 7.46 (m, 3H) ppm.

$^{13}\text{C}$  (125MHz,  $\text{CD}_3\text{OD}$ )  $\delta$  = 11.40, 45.41, 95.92, 112.97, 114.00, 116.09, 116.77, 120.24, 129.80, 131.78, 133.28, 155.75, 157.74, 158.17 ppm.

MS (ESI-TOF) m/z calculated for  $[\text{M}]^+$  415.2380; Found  $[\text{M}]^+$ : 415.2422.

Data for **2b**: Compound **2b** was synthesized according to the procedure mentioned above using **M6** (202.9 mg) and **MX-1** (331.2 mg) as precursors. Purification by column chromatography on

silica gel using DCM/MeOH (98/2 to 90/10) as eluent gave compound **2b** as violet solid (53.6 mg, 11 %).

<sup>1</sup>H-NMR (500 MHz, CD<sub>3</sub>OD): δ = 1.32 (t, J = 7.1Hz, 12H), 3.70 (q, J = 7.1Hz, 8H), 6.83 (d, J = 2.8Hz, 2H), 6.99 (m, 3H), 7.11 (dd, <sup>1</sup>J = 9.5Hz, <sup>2</sup>J = 2.4Hz, 2H), 7.25 (d, J = 9.5Hz, 2H), 7.64 (d, <sup>1</sup>J = 8.8Hz, 2H) ppm.

<sup>13</sup>C (125MHz, CD<sub>3</sub>OD) δ = 11.31, 45.87, 96.14, 105.36, 114.58, 118.76, 128.61, 131.33, 134.27, 156.03, 158.26 ppm.

MS (ESI-TOF) m/z calculated for [M]<sup>+</sup> 493.14852; Found [M]<sup>+</sup>: 493.1584.

Data for **2c**: Compound **2c** was synthesized according to the procedure mentioned above using **M7** and **MX-3** as precursors. Purification by column chromatography on silica gel using DCM/MeOH (98/2 to 90/10) as eluent gave compound **2c** as violet solid (82.1 mg, 12 %).

<sup>1</sup>H-NMR (500 MHz, CD<sub>3</sub>OD): δ = 2.01 (t, J = 5.3Hz, 4H), 2.14 (t, J = 5.5Hz, 4H), 2.78 (t, J = 6.0Hz, 4H), 3.11 (t, J = 6.3Hz, 4H), 3.56 (t, J = 5.7Hz, 4H), 3.60 (t, J = 5.7Hz, 8H), 6.81 (s, 2H), 7.78 (s, 1H) ppm.

<sup>13</sup>C (125MHz, CD<sub>3</sub>OD) δ = 19.54, 19.63, 20.48, 27.23, 50.14, 50.62, 101.97, 105.47, 111.80, 114.45, 115.36, 124.45, 125.50, 133.12, 134.08, 151.35, 152.58, 153.61 ppm.

MS (ESI-TOF) m/z calculated for [M]<sup>+</sup> 698.96750; Found [M]<sup>+</sup>: 698.9999.

Data for **3**: Compound **3** was synthesized according to the procedure mentioned above using **M1** (106.2 mg) and **MX-1** (330.5 mg) as precursors. Purification by column chromatography on silica gel using DCM/MeOH (98/2 to 90/10) as eluent gave compound **3** as violet solid (119.1 mg, 30 %).

<sup>1</sup>H-NMR (500 MHz, CD<sub>3</sub>OD): δ = 1.32 (t, J = 7.1Hz, 12H), 3.69 (q, J = 7.1Hz, 8H), 6.99 (s, 1H), 7.09 (dd, <sup>1</sup>J = 9.5Hz, <sup>2</sup>J = 1.7Hz, 2H), 7.38 (d, J = 9.5Hz, 2H), 7.49 (m, 2H), 7.68 (m, 3H) ppm.

<sup>13</sup>C (125MHz, CD<sub>3</sub>OD) δ = 11.50, 45.53, 96.09, 113.20, 114.18, 128.70, 129.42, 130.08, 131.80, 132.25, 155.86, 157.70, 158.29 ppm.

MS (ESI-TOF) m/z calculated for [M]<sup>+</sup> 399.2431; Found [M]<sup>+</sup>: 399.2450.

## 2. Data and Spectra from Optical Spectroscopy

Table S1: Equation used for sigmoidal curve fitting of pH titration experiments and fitting parameters using normalized and integrated fluorescence emission spectral data ( $\int_{550nm}^{700nm} \text{Emission}$ ). The  $pK_a$  value was determined from  $\log X_0$ .

| Dye   | Model              |                   | Dose response                                       |                    |                |
|-------|--------------------|-------------------|-----------------------------------------------------|--------------------|----------------|
|       | Equation 1         |                   | $y = A1 + \frac{A2 - A1}{1 + 10^{(\log X_0 - X)p}}$ |                    |                |
|       | A1                 | A2                | $\log X_0$                                          | p                  | R <sup>2</sup> |
| 3_1   | -                  | -                 | -                                                   | -                  | -              |
| 3_2   | -                  | -                 | -                                                   | -                  | -              |
| 3_3   | -                  | -                 | -                                                   | -                  | -              |
| 1a_1  | -0.00153 ± 0.01152 | 0.99307 ± 0.008   | 8.99409 ± 0.02238                                   | -1.04077 ± 0.06009 | 0.99797        |
| 1a_2  | -0.0023 ± 0.0025   | 0.99698 ± 0.00183 | 8.98378 ± 0.00557                                   | -0.99819 ± 0.01405 | 0.99993        |
| 1a_3  | 0.00161 ± 0.00551  | 0.99169 ± 0.00367 | 8.99118 ± 0.01076                                   | -1.05934 ± 0.02795 | 0.99959        |
| 1b_1  | -0.00452 ± 0.00688 | 0.9871 ± 0.00677  | 7.35013 ± 0.01854                                   | -0.92596 ± 0.03303 | 0.99974        |
| 1b_2  | -0.00694 ± 0.00577 | 0.99151 ± 0.0052  | 7.37477 ± 0.01441                                   | -0.88797 ± 0.02344 | 0.99981        |
| 1b_3  | -0.00444 ± 0.00433 | 0.99258 ± 0.00385 | 7.36961 ± 0.01139                                   | -0.92499 ± 0.01948 | 0.99991        |
| 1c_1  | 0.00531 ± 0.00703  | 1.00062 ± 0.00961 | 5.54975 ± 0.0191                                    | -0.99844 ± 0.04353 | 0.99934        |
| 1c_2  | 0.00135 ± 0.00365  | 1.00412 ± 0.00546 | 5.49847 ± 0.01193                                   | -0.90259 ± 0.02171 | 0.99984        |
| 1c_3  | 0.0029 ± 0.00511   | 0.99983 ± 0.00757 | 5.49417 ± 0.01644                                   | -0.93257 ± 0.02911 | 0.99964        |
| 2a_1  | -0.0074 ± 0.01092  | 0.97579 ± 0.00648 | 9.42156 ± 0.02378                                   | -0.97041 ± 0.04784 | 0.99899        |
| 2a_2  | -0.0057 ± 0.01448  | 0.98093 ± 0.00886 | 9.41741 ± 0.03109                                   | -0.99741 ± 0.06554 | 0.99813        |
| 2a_3  | -0.00619 ± 0.00439 | 0.99178 ± 0.00304 | 9.4333 ± 0.00961                                    | -0.91641 ± 0.01805 | 0.99982        |
| 2b_1  | -0.00474 ± 0.00566 | 0.99181 ± 0.00328 | 8.69353 ± 0.0113                                    | -0.91921 ± 0.02133 | 0.99984        |
| 2b_2  | -0.00781 ± 0.00718 | 0.98311 ± 0.00447 | 8.70158 ± 0.01414                                   | -0.90209 ± 0.02316 | 0.99968        |
| 2b_3  | -0.0087 ± 0.00829  | 0.9846 ± 0.00549  | 8.70638 ± 0.01799                                   | -0.89107 ± 0.02883 | 0.99954        |
| 1c*_1 | 0.00339 ± 0.00633  | 0.99253 ± 0.00922 | 5.4789 ± 0.02134                                    | -0.79734 ± 0.02734 | 0.99932        |
| 1c*_2 | 0.00687 ± 0.0064   | 0.9866 ± 0.00809  | 5.4624 ± 0.01814                                    | -0.90459 ± 0.03179 | 0.99935        |
| 1c*_3 | 0.00406 ± 0.01189  | 0.97976 ± 0.01519 | 5.47075 ± 0.03566                                   | -0.87098 ± 0.05412 | 0.99779        |
| 1d_1  | 0.00183 ± 0.00673  | 1.00705 ± 0.00876 | 5.85981 ± 0.02282                                   | -0.77618 ± 0.0279  | 0.99951        |
| 1d_2  | 0.00464 ± 0.00802  | 0.99972 ± 0.01027 | 5.87754 ± 0.02879                                   | -0.82544 ± 0.03879 | 0.99926        |
| 1d_3  | 0.00222 ± 0.0067   | 1.00509 ± 0.00773 | 5.87255 ± 0.02003                                   | -0.78119 ± 0.02684 | 0.99958        |
| 2c_1  | 0.02014 ± 0.0032   | 0.9904 ± 0.00277  | 5.11658 ± 0.00824                                   | -1.0997 ± 0.02157  | 0.99981        |
| 2c_2  | 0.01504 ± 0.01215  | 1.00333 ± 0.01239 | 5.13842 ± 0.04425                                   | -0.69362 ± 0.04765 | 0.99797        |
| 2c_3  | 0.02637 ± 0.02076  | 1.0122 ± 0.02166  | 5.17115 ± 0.04877                                   | -0.8743 ± 0.07554  | 0.99721        |

### 2.1. Absorption and emission spectra of the pH-titration (triplicate measurement) of the synthesized dyes (1 μmol/L) in a water-methanol mixture (H<sub>2</sub>O/MeOH 2/1 vol%) containing borate-citrate buffer (25mM)

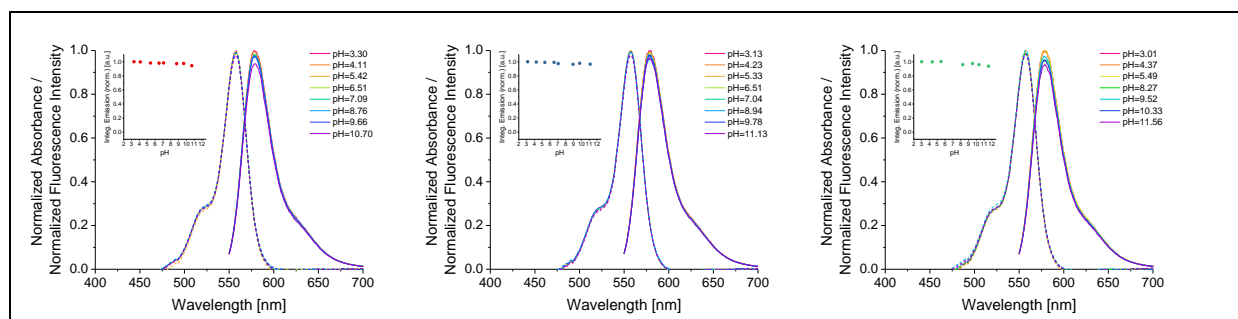

Figure S2: pH-titration of **3** as triplicate measurement.

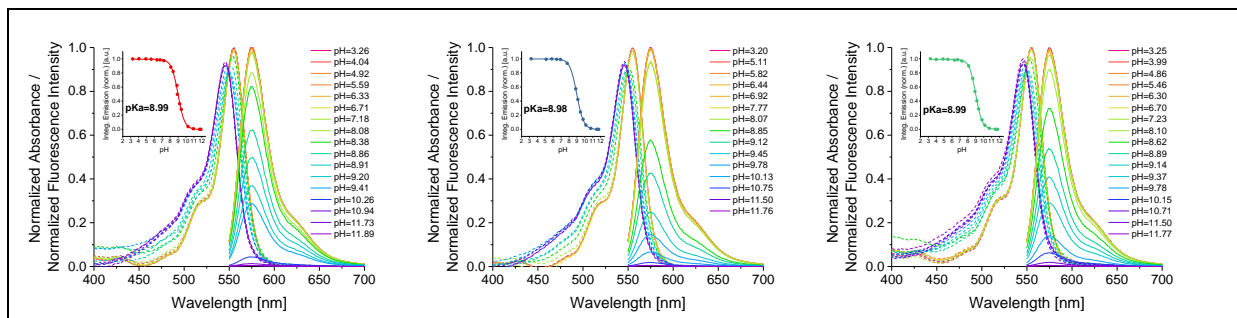

Figure S3: pH-titration of **1a** as triplicate measurement.

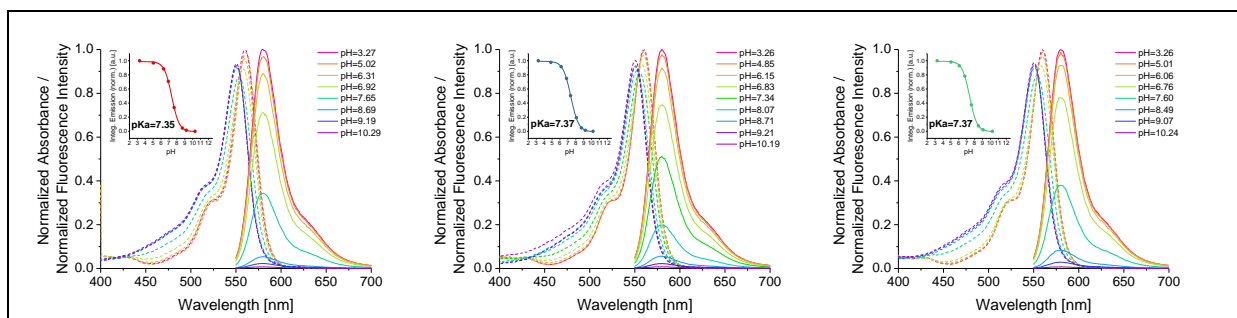

Figure S4: pH-titration of **1b** as triplicate measurement.

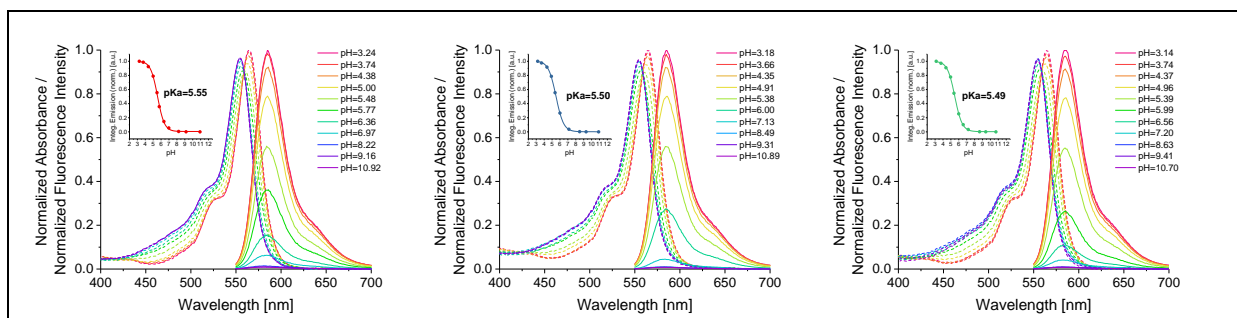

Figure S5: pH-titration of **1c** as triplicate measurement.

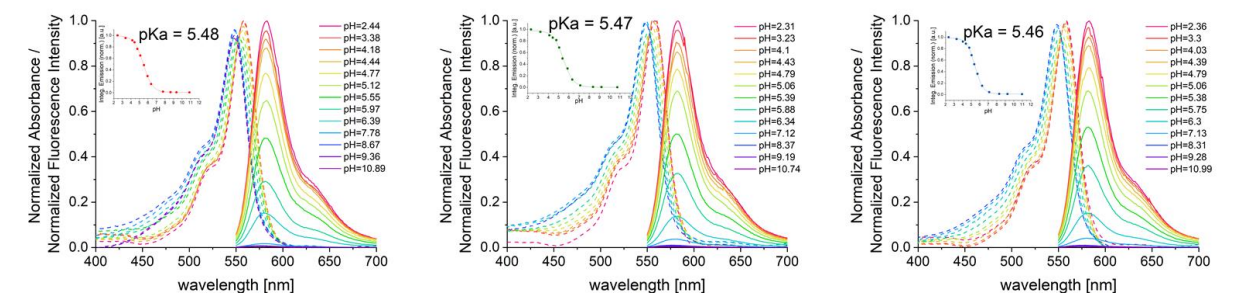

Figure S6: pH-titration of **1c\*** as triplicate measurement.

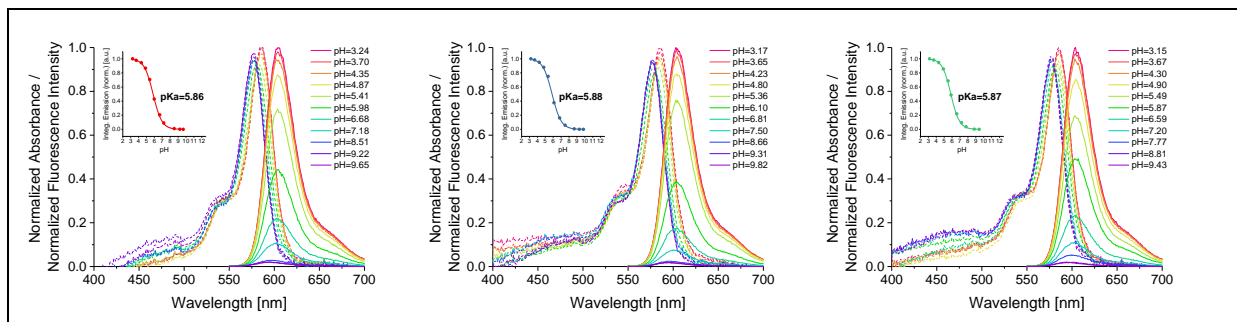

Figure S7: pH-titration of **1d** as triplicate measurement.

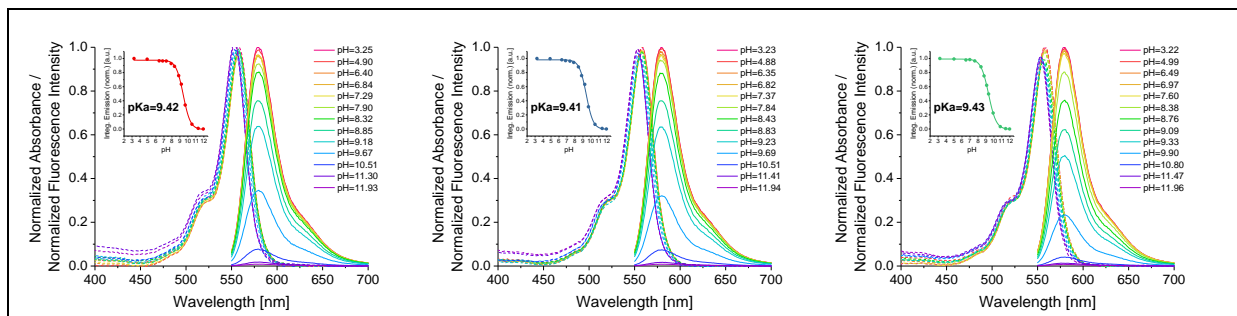

Figure S8: pH-titration of **2a** as triplicate measurement.

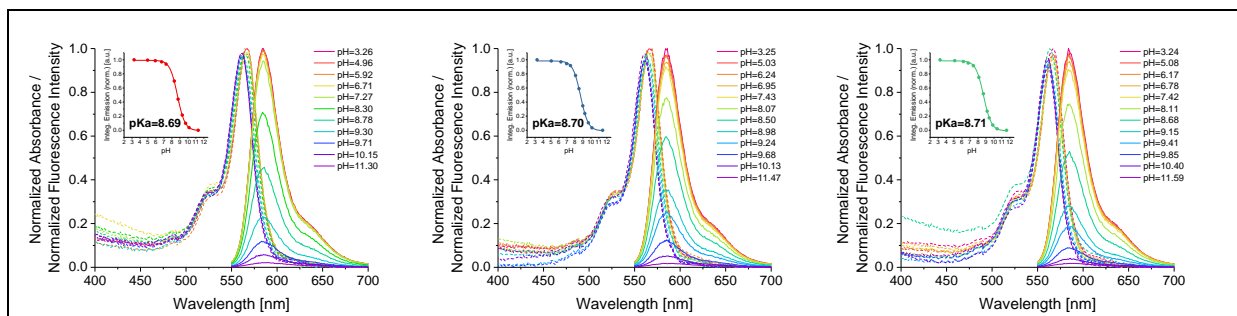

Figure S9: pH-titration of **2b** as triplicate measurement.

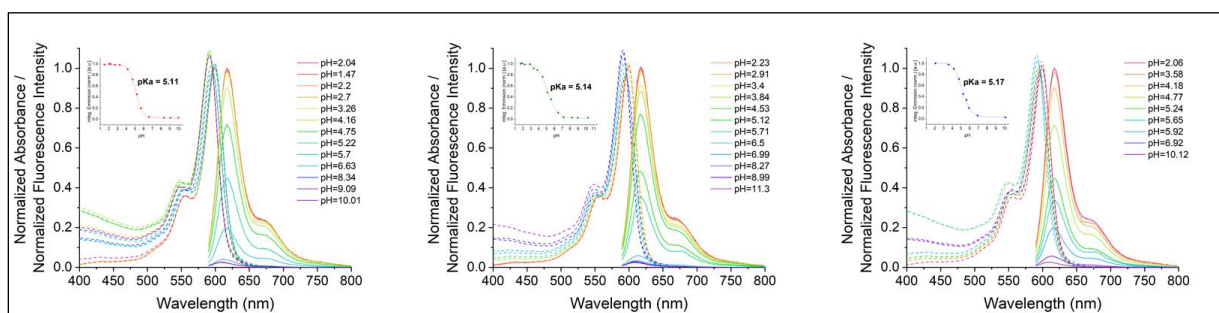

Figure S10: pH-titration of **2c** as triplicate measurement.

## 2.2. pH-titration curves of **1c** (1 $\mu\text{mol/L}$ ) in a water-methanol mixture ( $\text{H}_2\text{O}/\text{MeOH}$ 2/1 vol%) containing borate-citrate buffer (25mM) at 20°C and 40°C

Table S2: Fitting parameters using normalized and integrated fluorescence emission spectral data ( $\int_{550\text{nm}}^{700\text{nm}}$  Emission).

| Dye            | A1                    | A2                    | $\log X_0$            | p                      | R       |
|----------------|-----------------------|-----------------------|-----------------------|------------------------|---------|
| <b>1c_20°C</b> | $0.00135 \pm 0.00365$ | $1.00412 \pm 0.00546$ | $5.49847 \pm 0.01193$ | $-0.90259 \pm 0.02171$ | 0.99984 |
| <b>1c_40°C</b> | $0.00151 \pm 0.0106$  | $1.01258 \pm 0.01644$ | $5.48016 \pm 0.03214$ | $-0.91341 \pm 0.05795$ | 0.99892 |

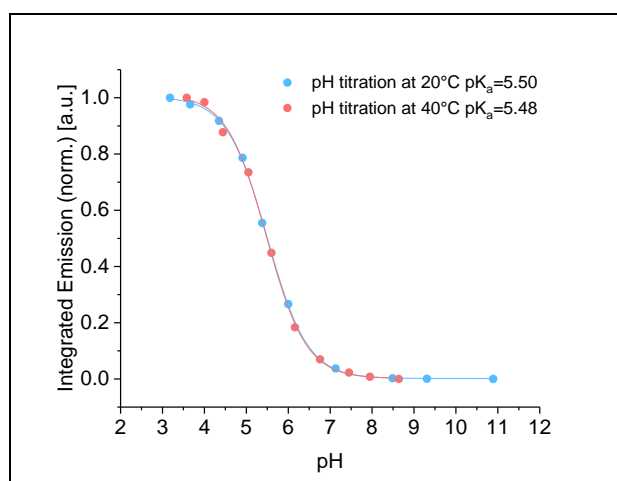

Figure S11: pH-titration curves of **1c** at 20°C and at 40°C.



**2.3. Reversibility of the switching between protonated and deprotonated form of the dyes (1 $\mu$ mol/L) in a water-methanol mixture (H<sub>2</sub>O/MeOH 2/1 vol%) containing borate-citrate buffer (25mM)**

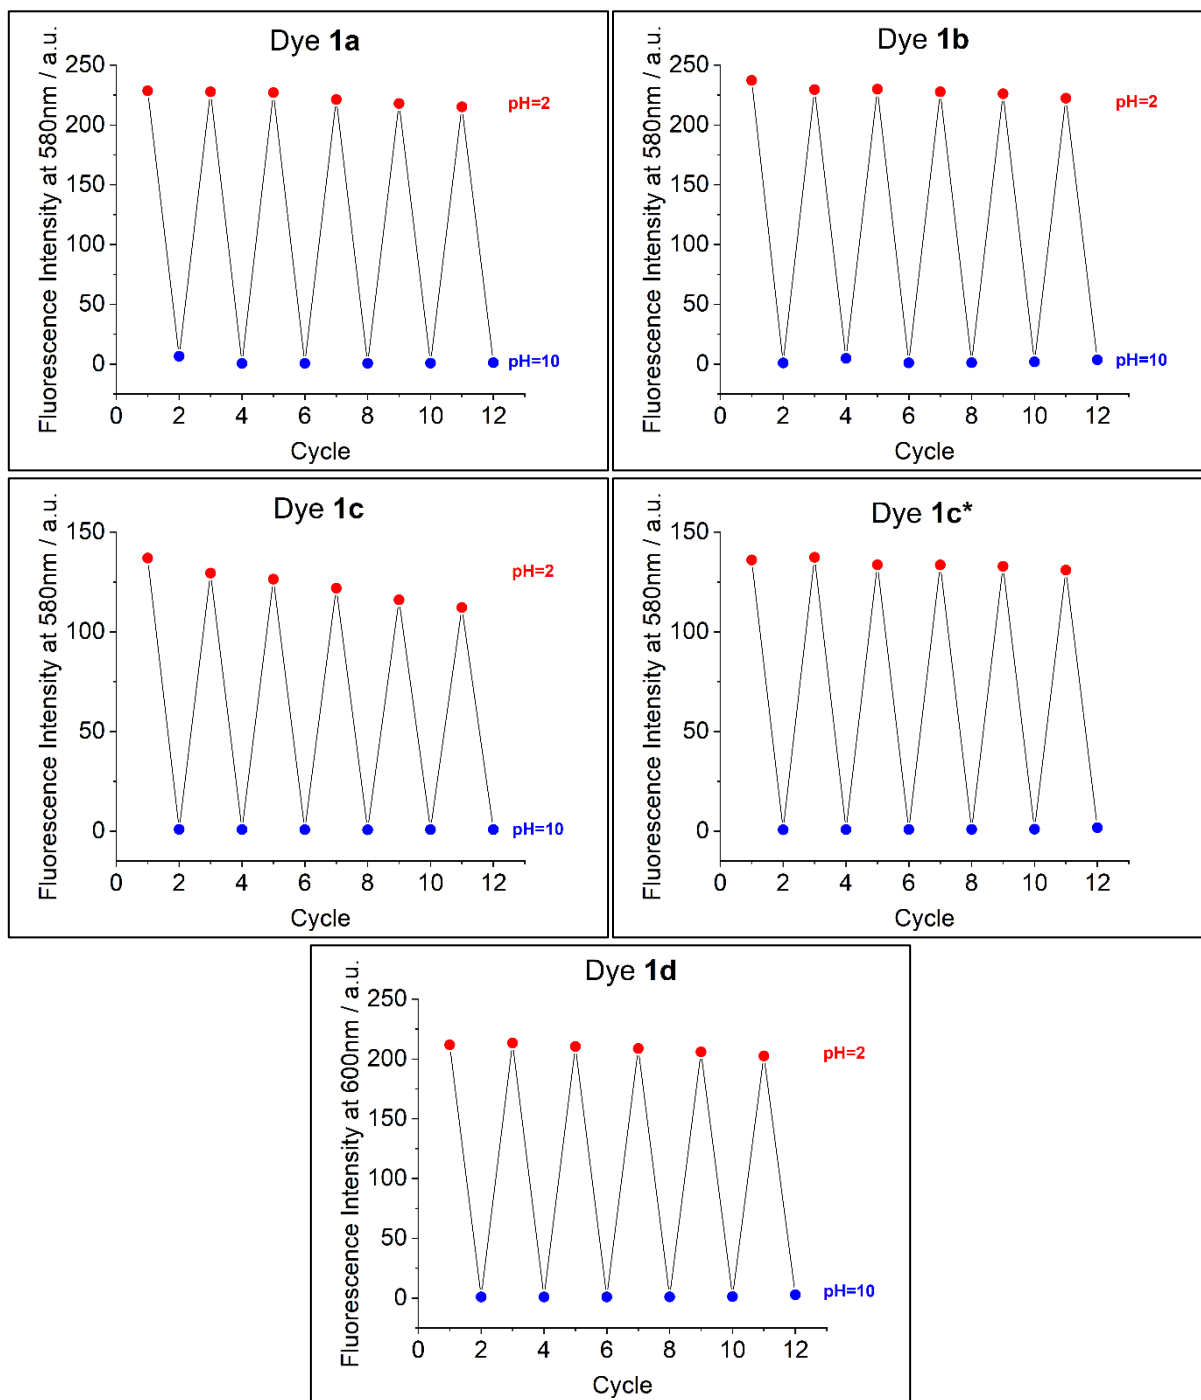

Figure S12: pOH-derived dyes **1a**, **1b**, **1c**, **1c\*** and **1d**.

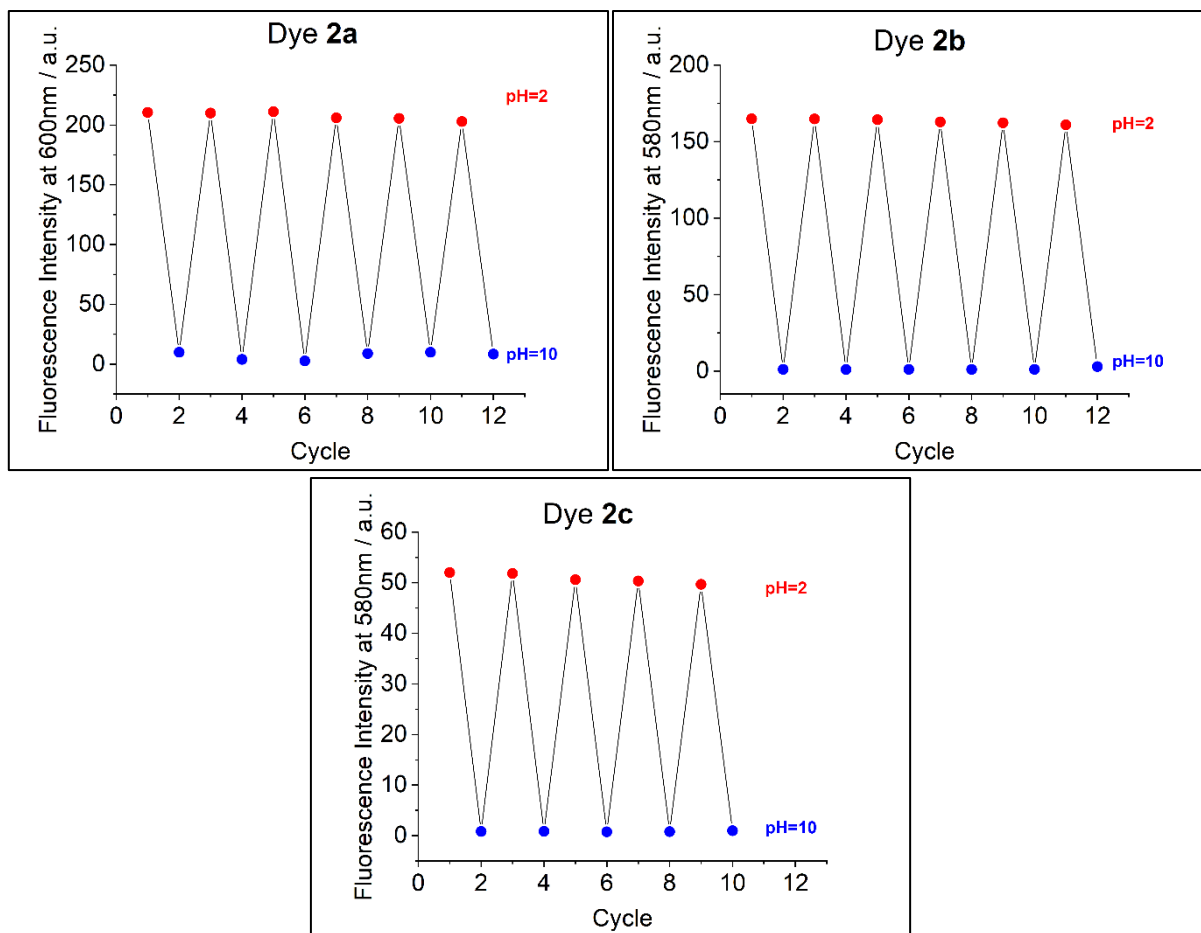

Figure S13: mOH-derived dyes **2a**, **2b** and **2c**.

**2.4. Absorption and emission spectra of the temperature dependence (averaged triplicate measurement) of the dyes 1c, 1d, 2b, 2c (1 $\mu$ mol/L) in a water-methanol mixture (H<sub>2</sub>O/MeOH 2/1 vol%) containing borate-citrate buffer (25mM)**

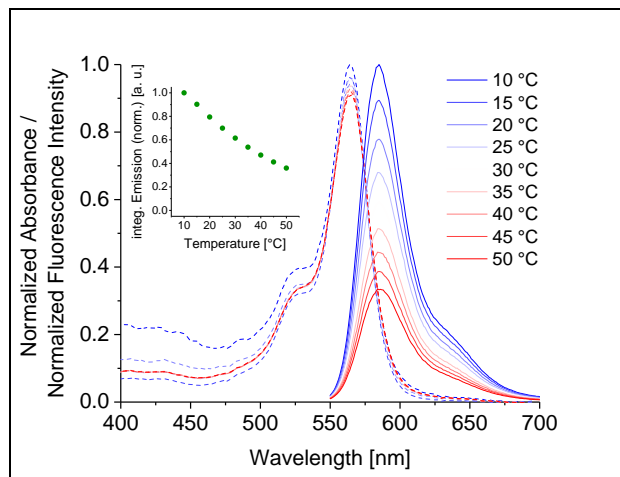

**Figure S14: Temperature sensitivity of 1c.**

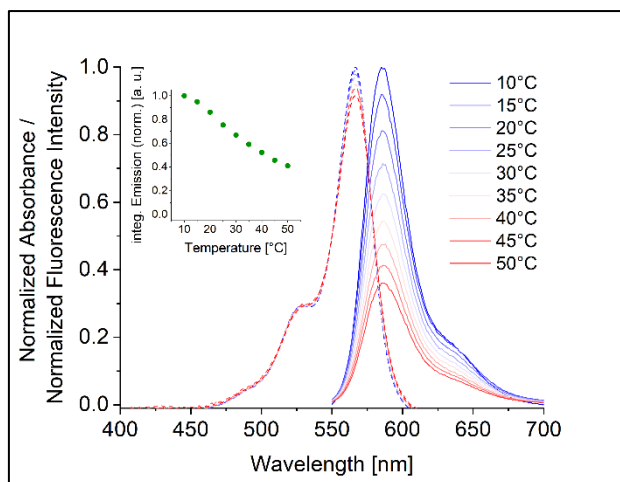

**Figure S15: Temperature sensitivity of 2b.**

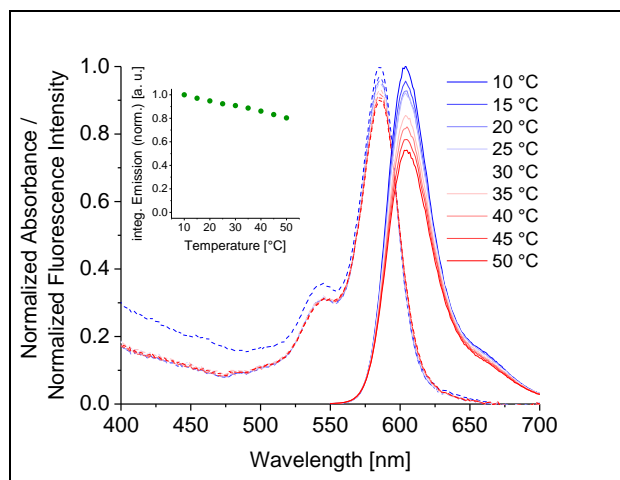

**Figure S16: Temperature sensitivity of 1d.**

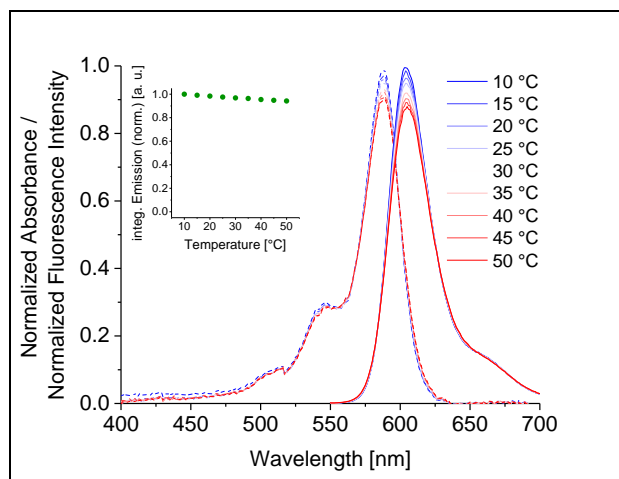

Figure S17: Temperature sensitivity of **2c**.

2.5. Fluorescence decay curves of the synthesized dyes (1  $\mu\text{mol/L}$ ) in methanol (averaged triplicate measurement).

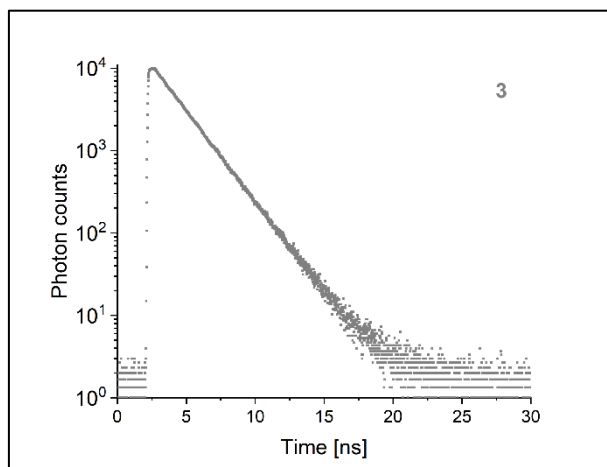

Figure S18: Fluorescence decay curves of **3**.

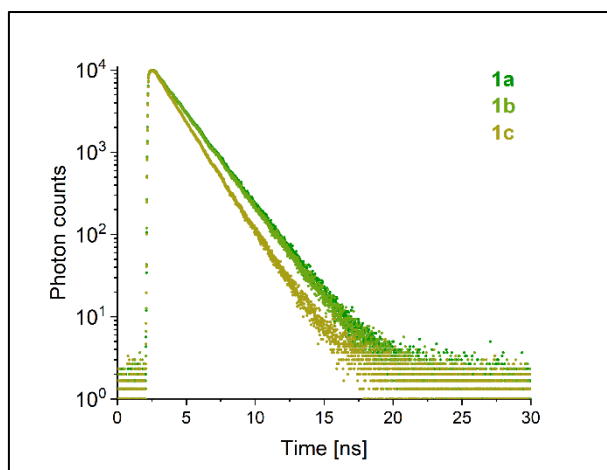

Figure S19: Fluorescence decay curves of pOH derived compounds **1a**, **1b**, **1c**.

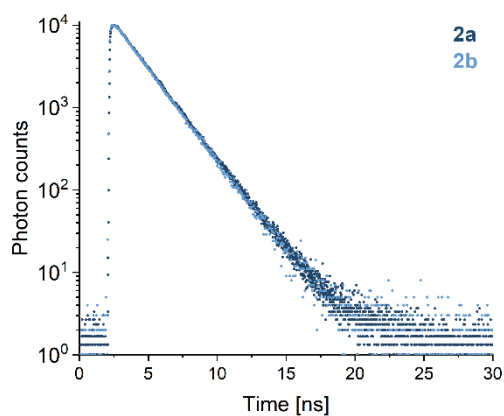

Figure S20: Fluorescence decay curves of mOH derived compounds **2a**, **2b**.

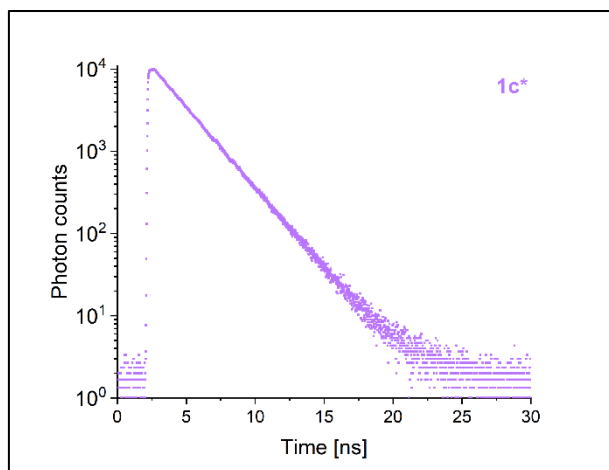

Figure S21: Fluorescence decay curves of **1c\***.

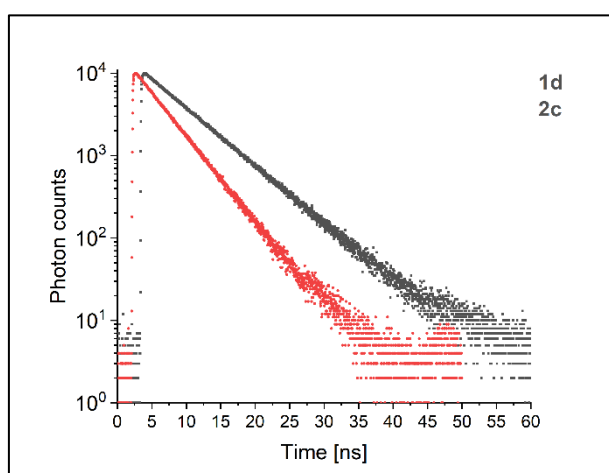

Figure S22: Fluorescence decay curves of Rhod 101-derived compounds **1d**, **2c**.

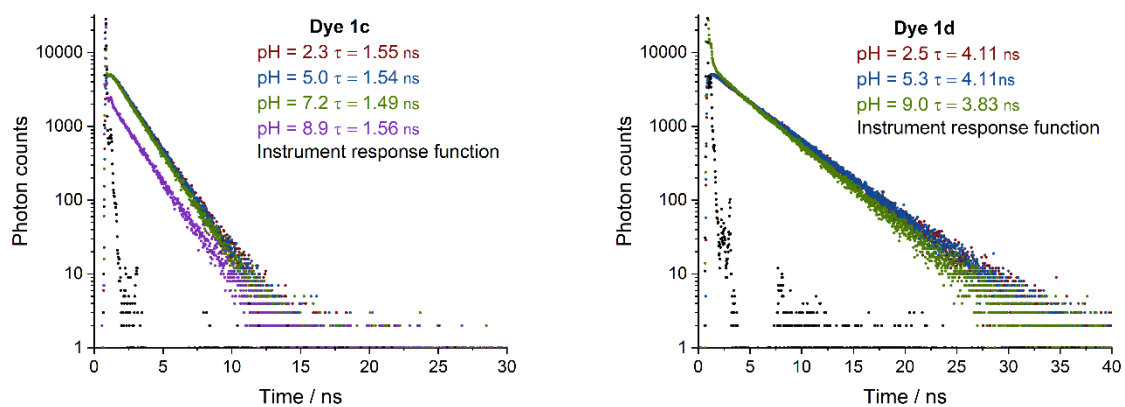

Figure S23: pH dependence of the fluorescence decay kinetics exemplary shown for dye **1c** and **1d**.

### 3. NMR spectra

#### Compound 1a

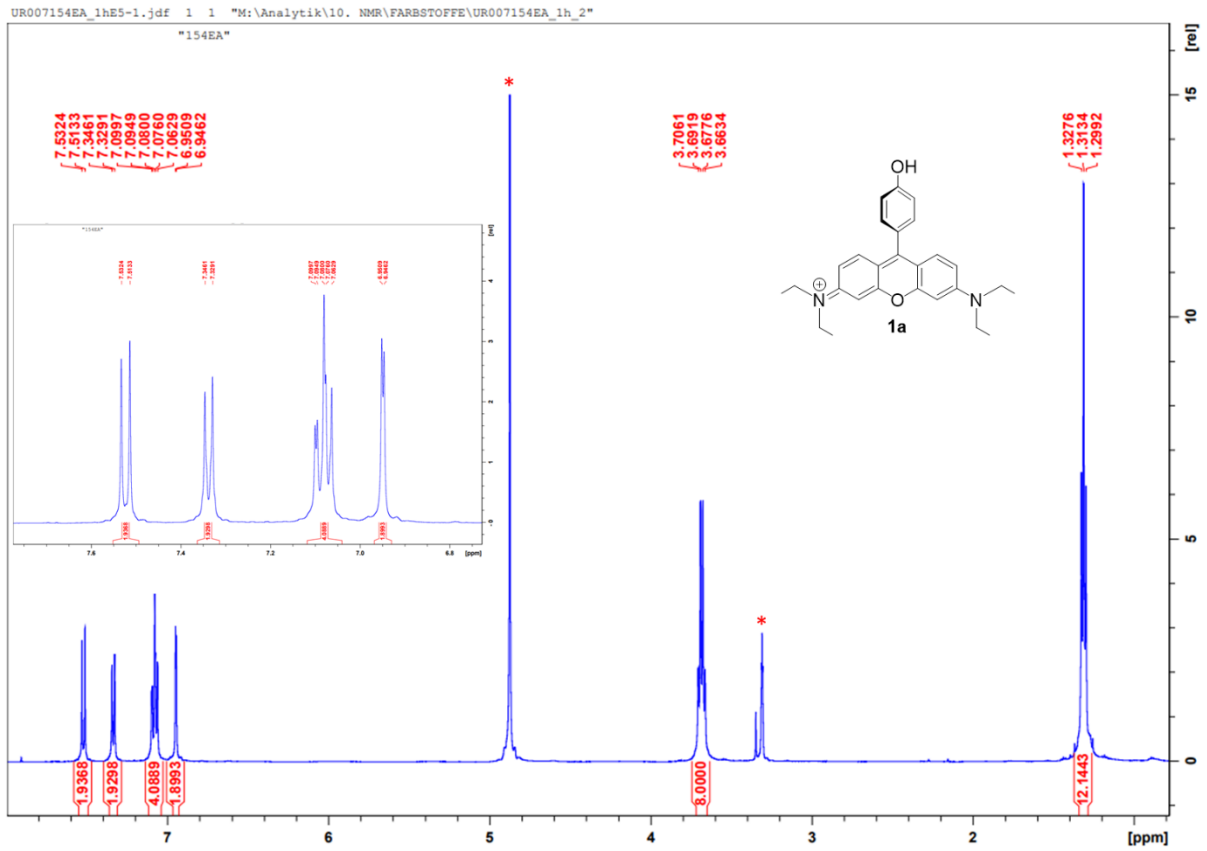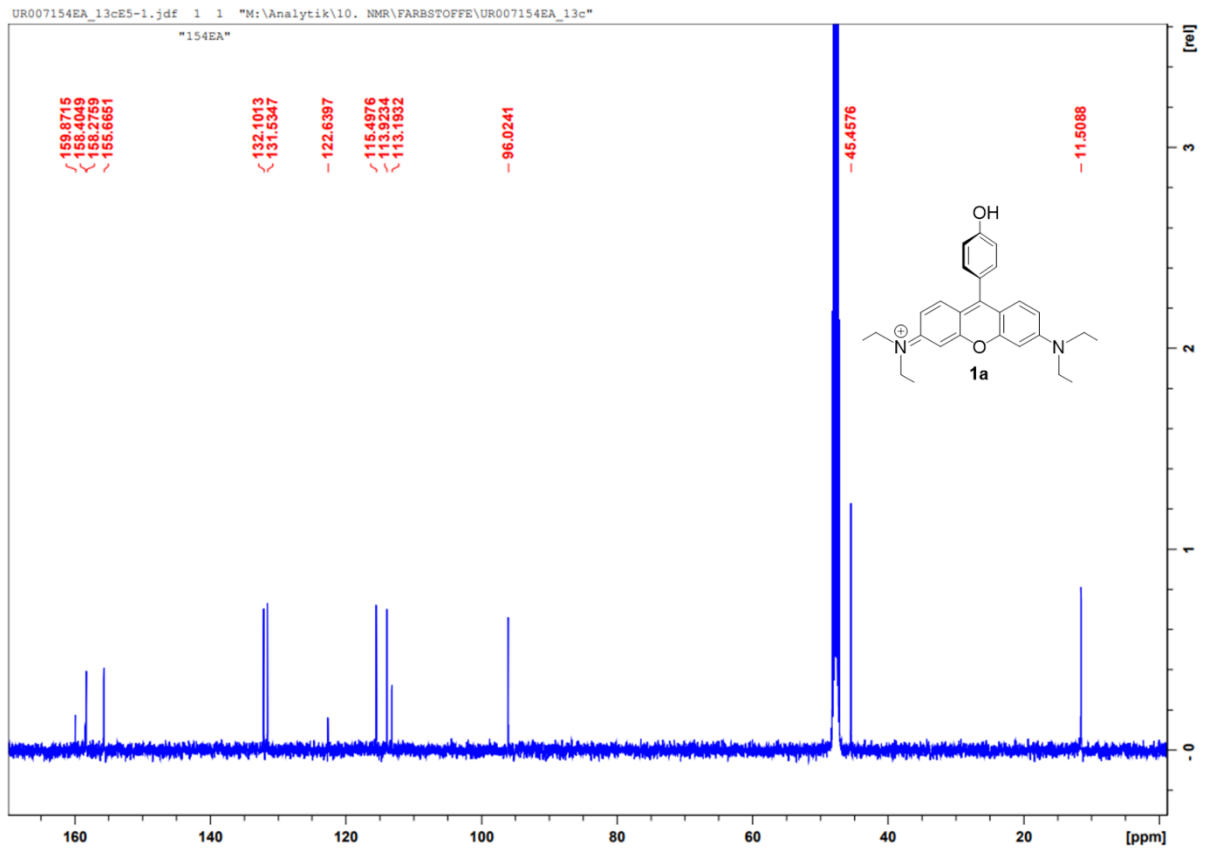

# Compound 1b

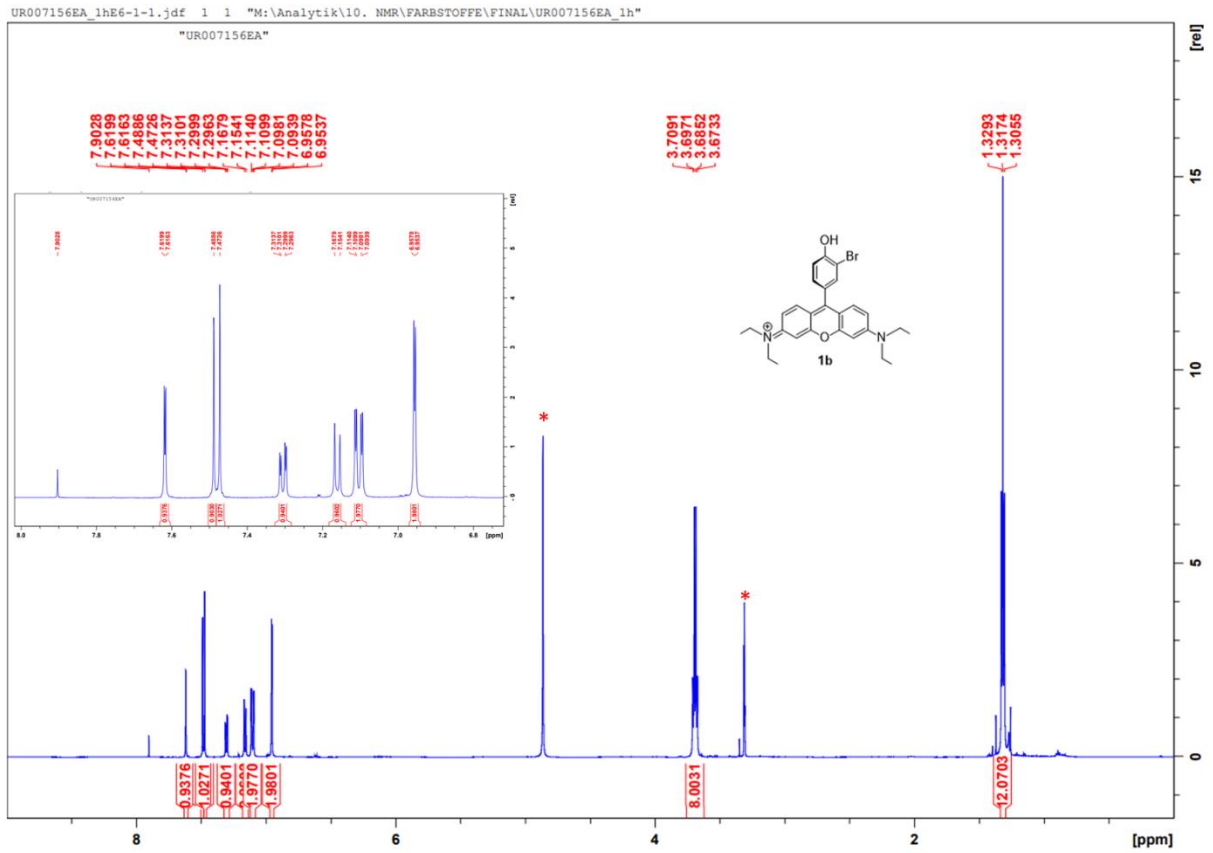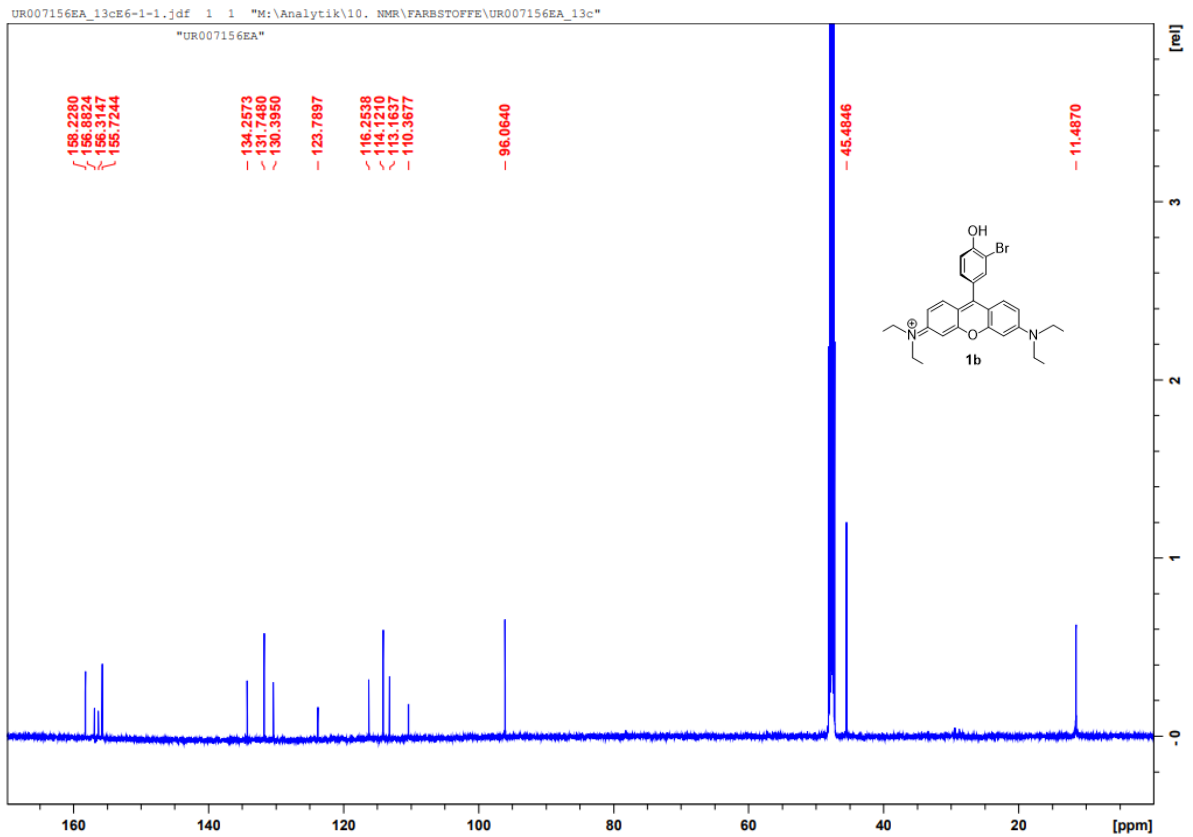



# Compound 1c

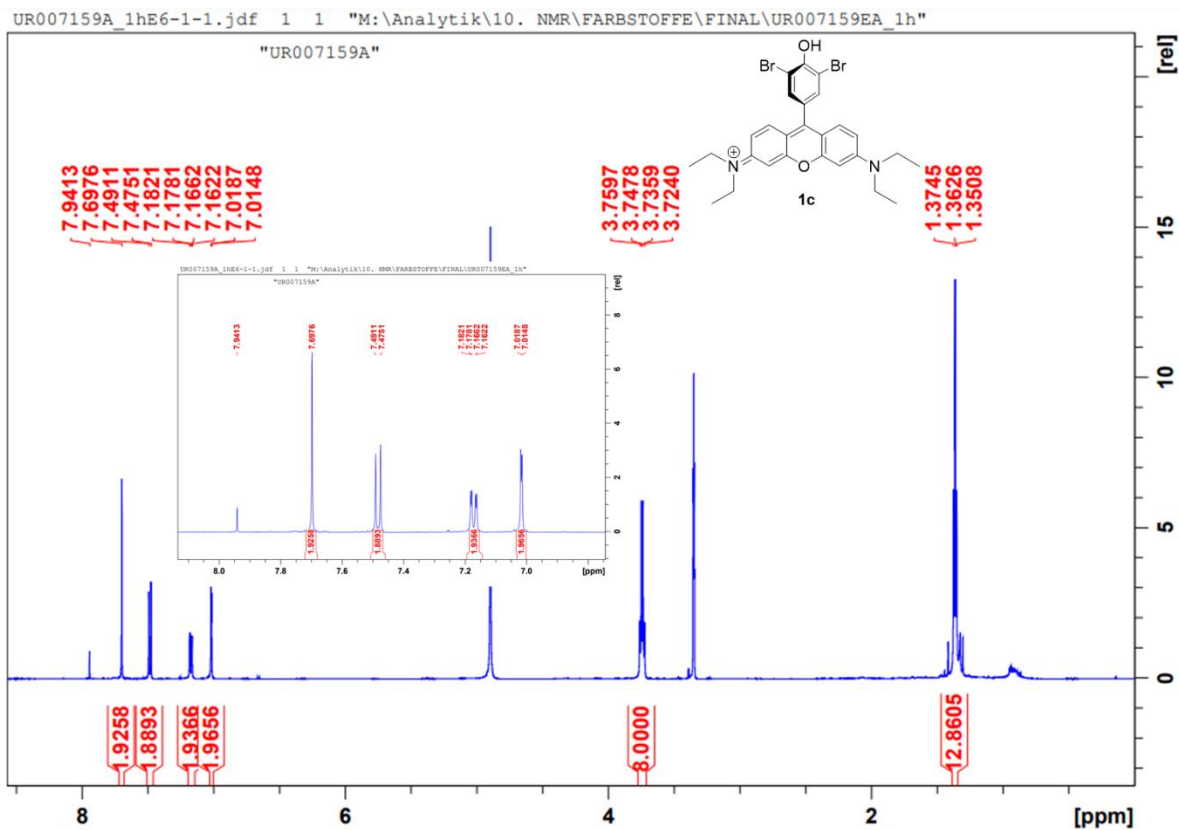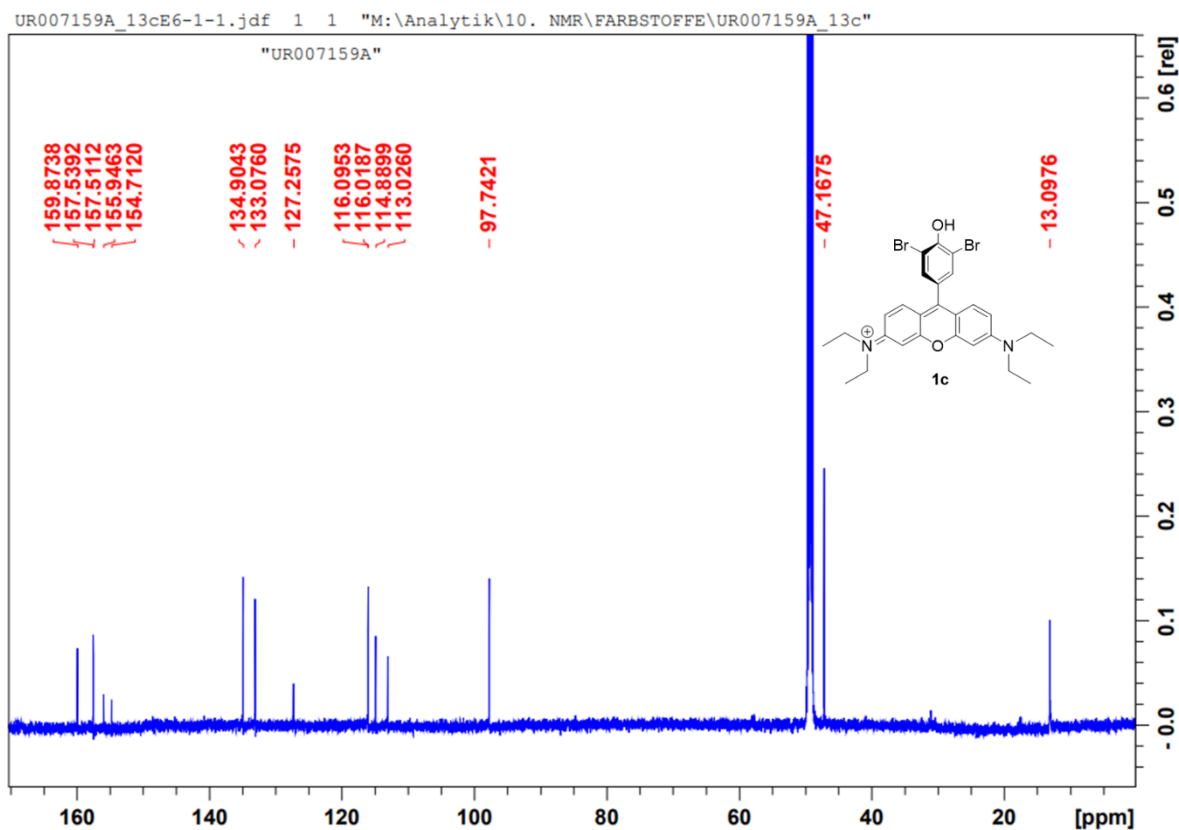

# Compound 1c\*

UR007158EA\_1hE6-1-1.jdf 1 1 "M:\Analytik\10. NMR\FARBSTOFFE\FINAL\UR007158EA\_1h"

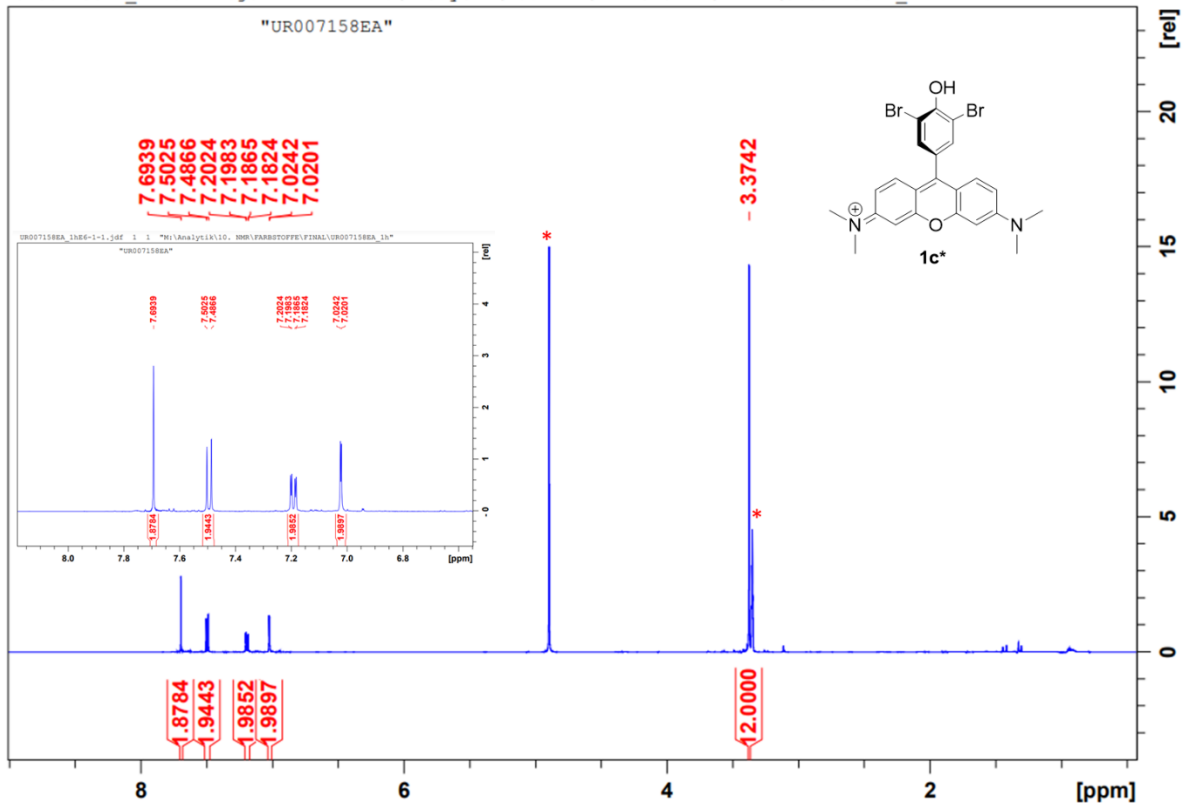

UR007158EA\_13cE6-1-1.jdf 1 1 "M:\Analytik\10. NMR\FARBSTOFFE\UR007158A\_13c"

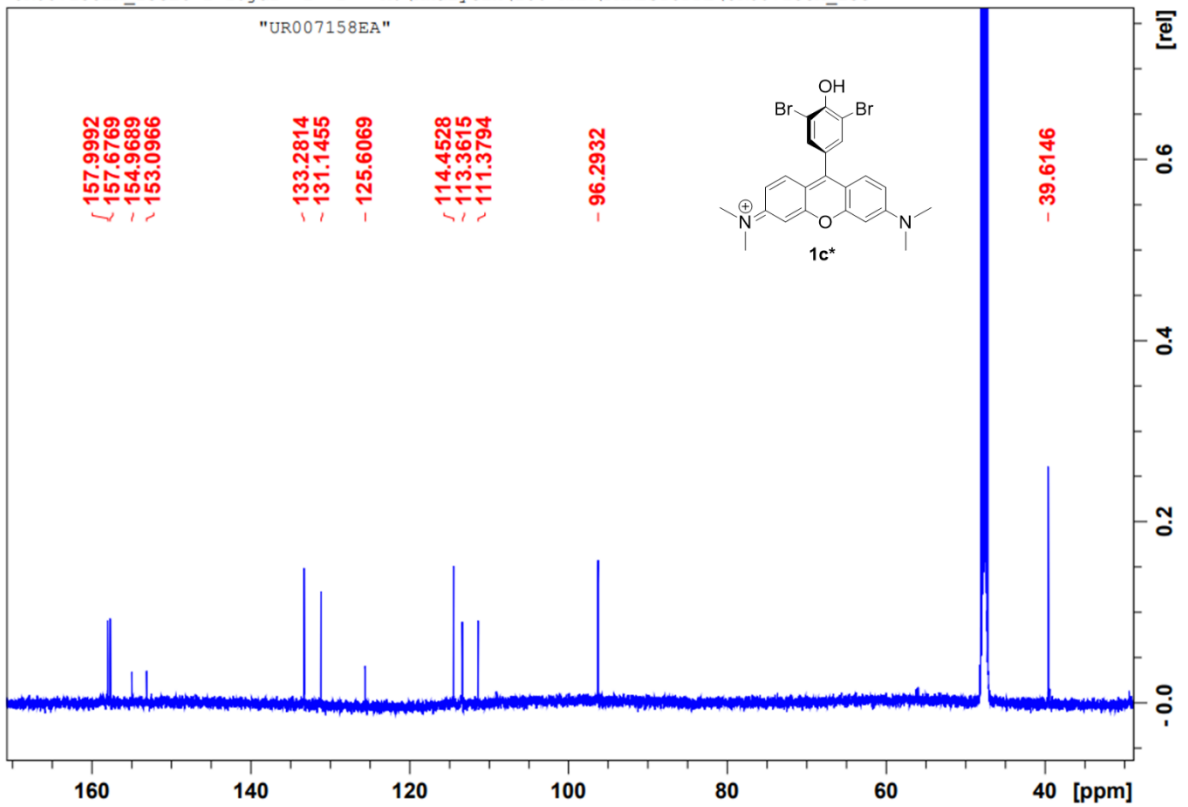

# Compound 1d

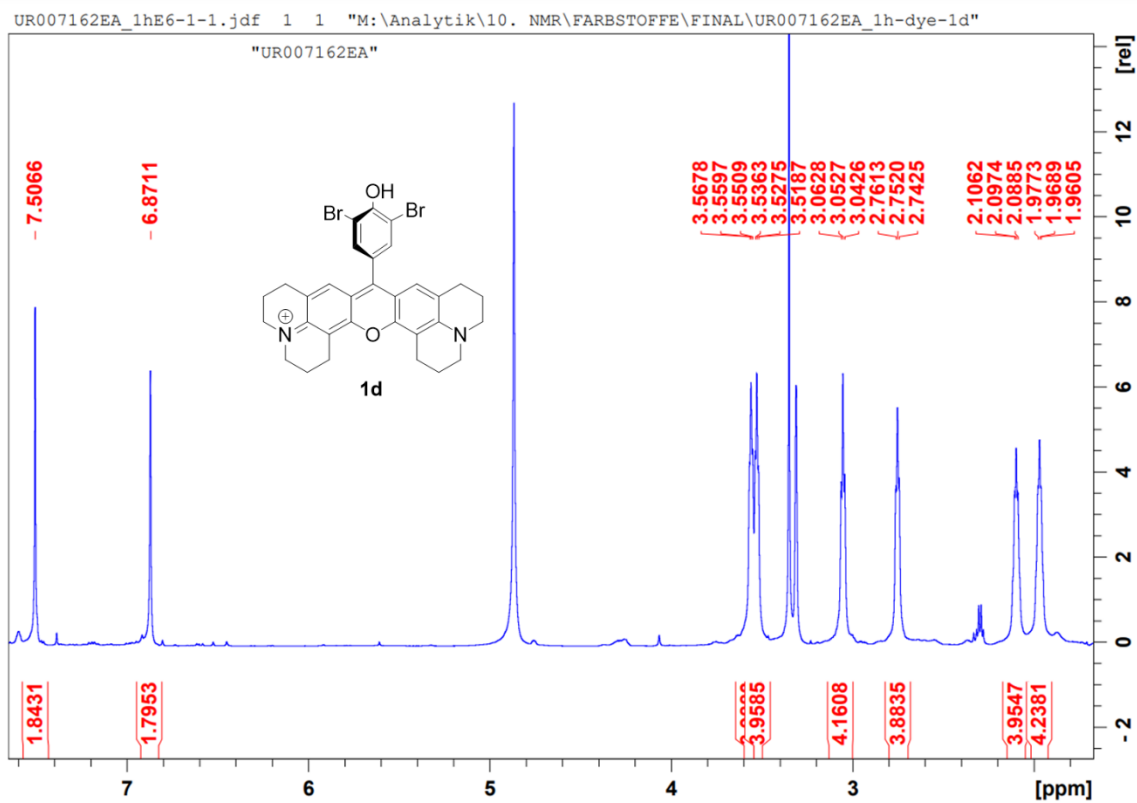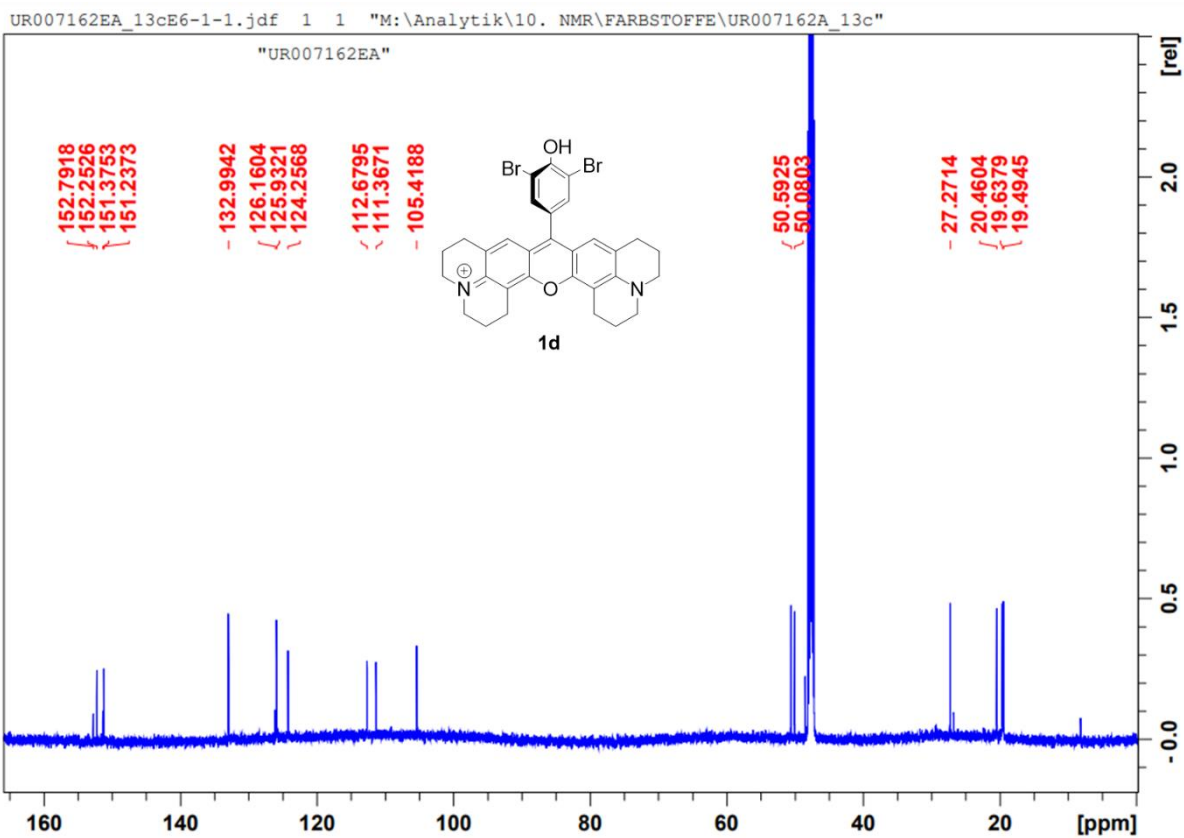

# Compound 2a

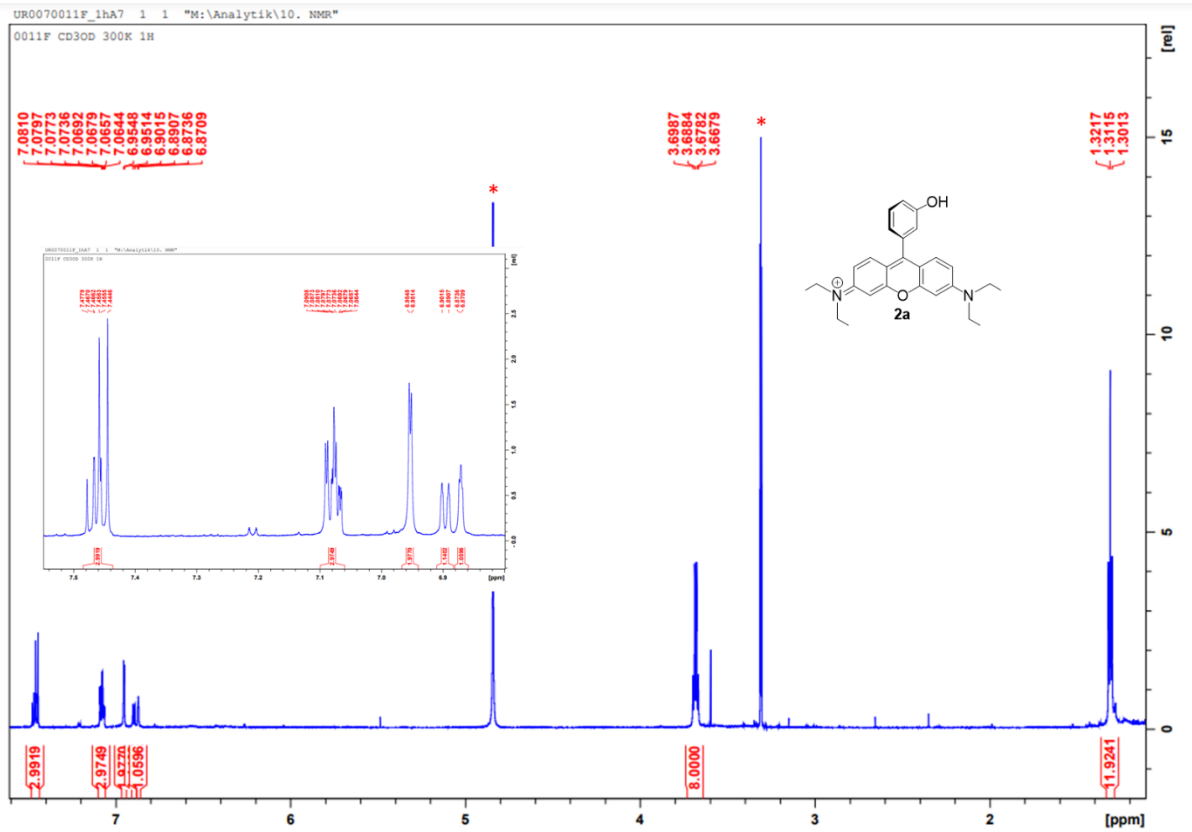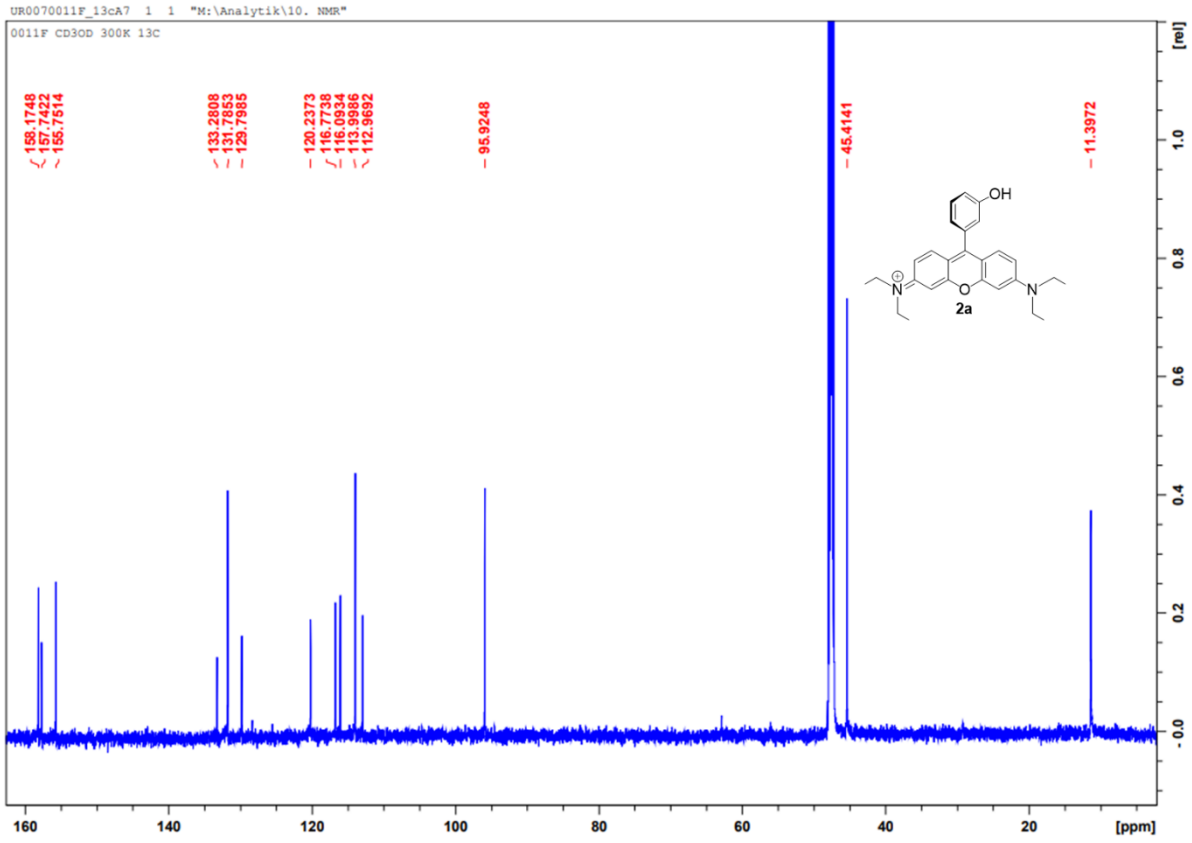

# Compound 2b

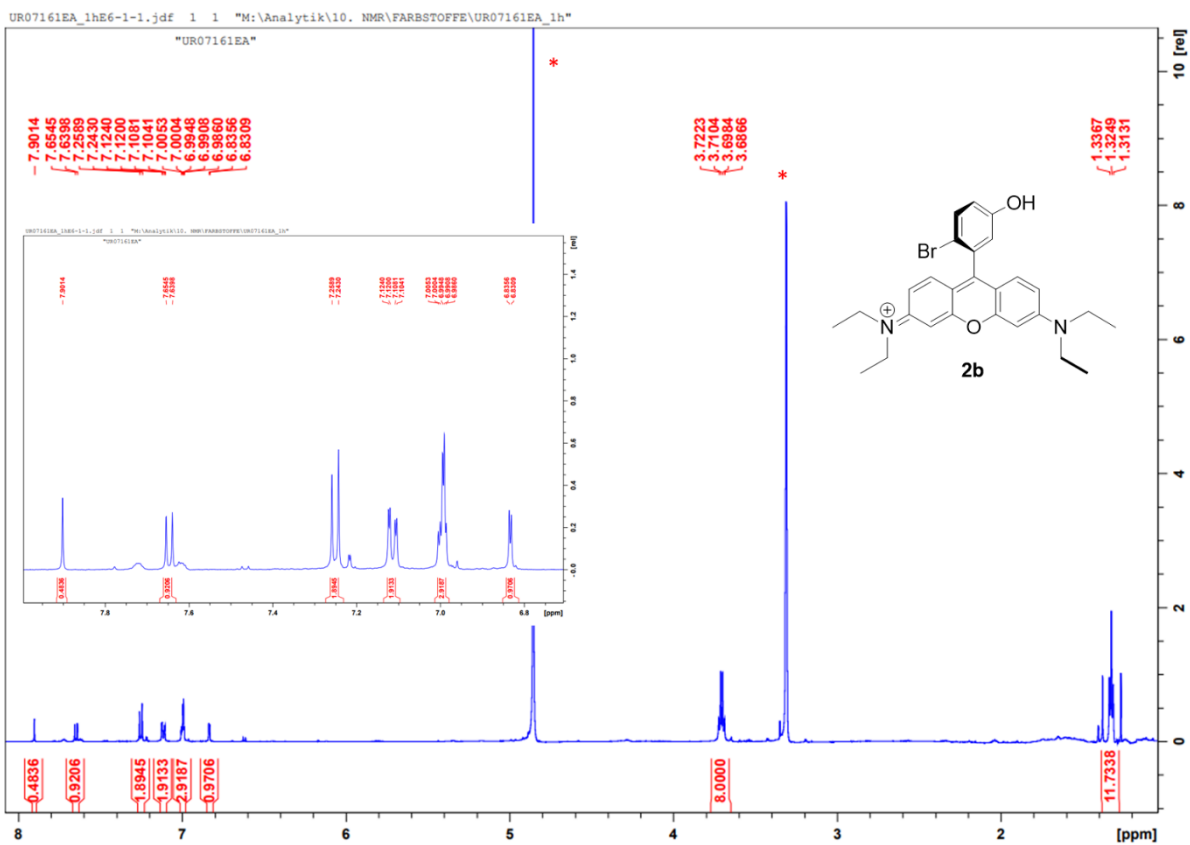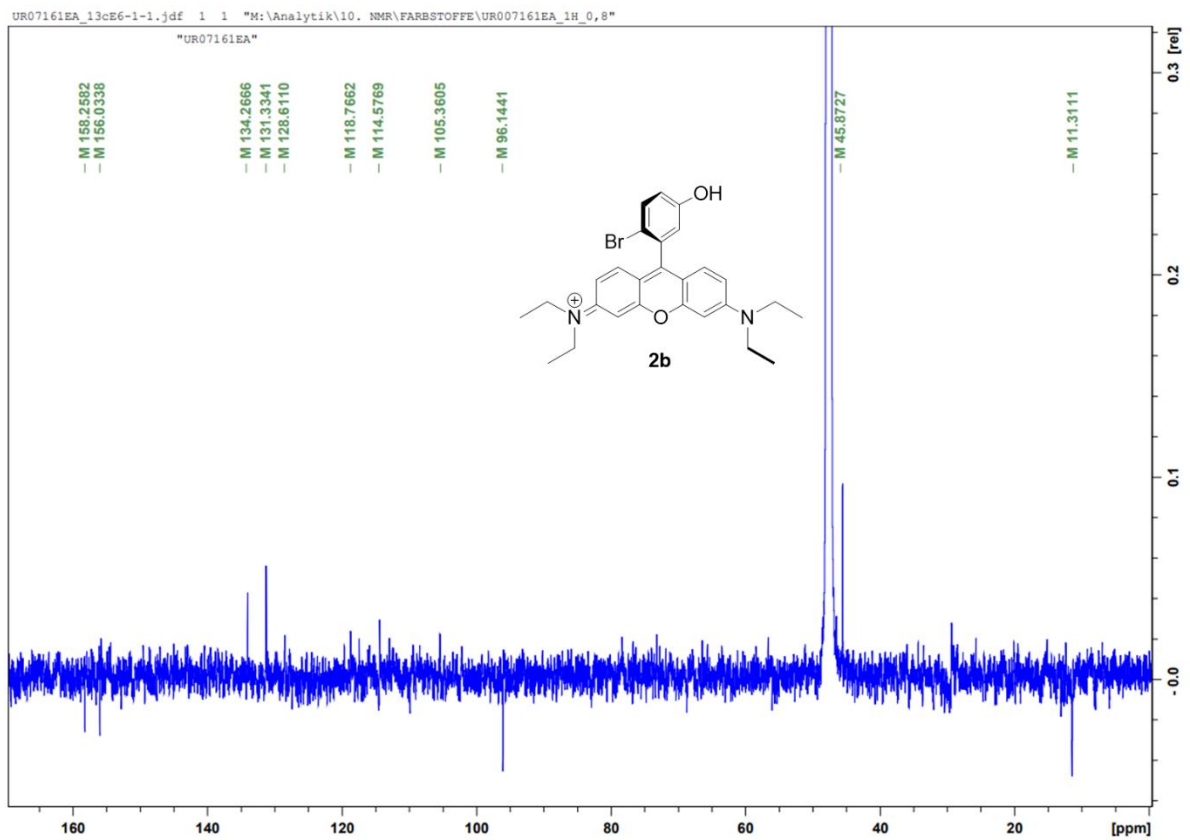

# Compound 2c

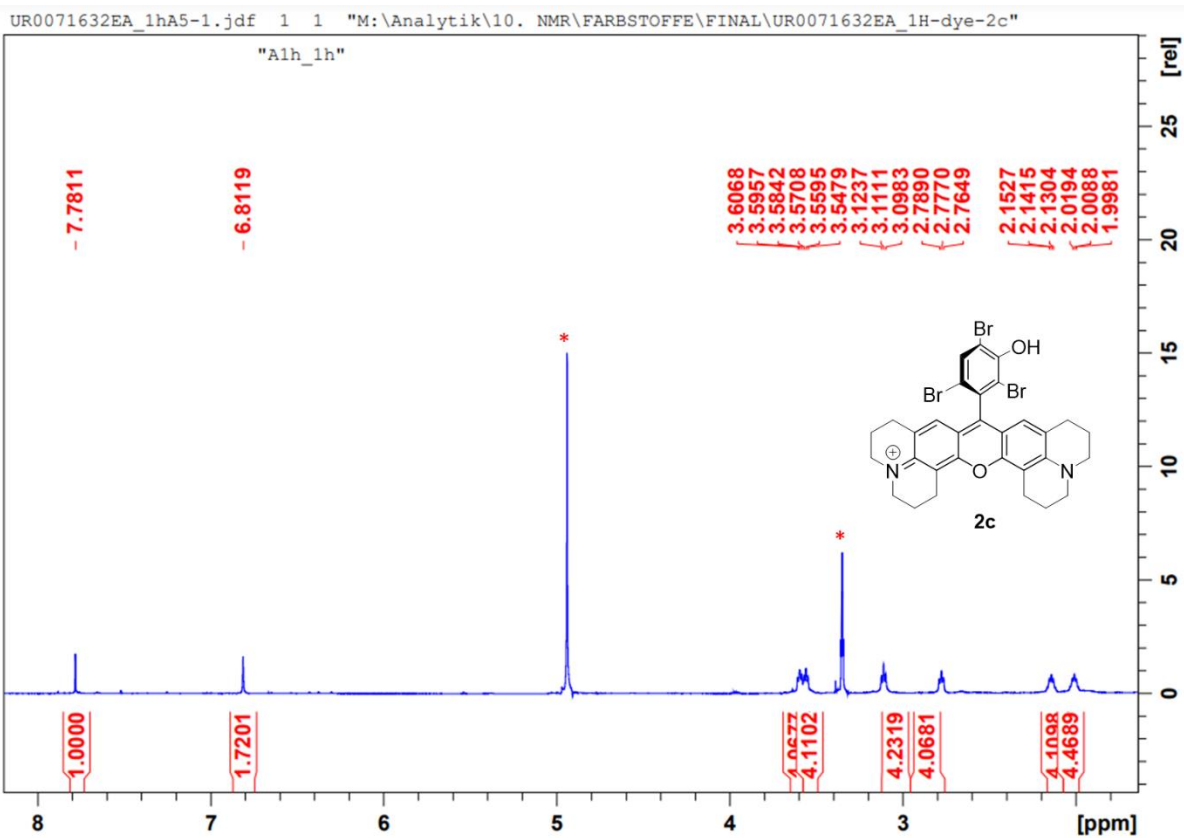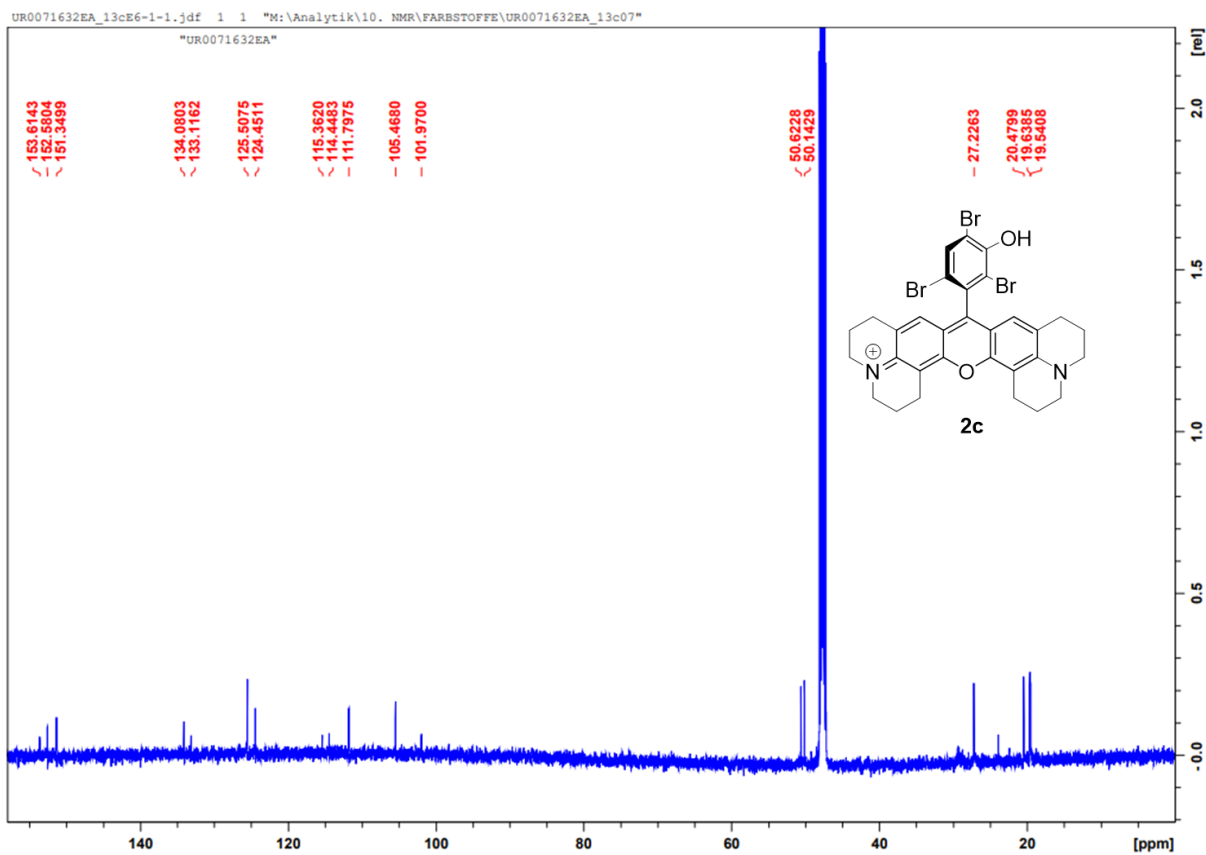

# Compound 3

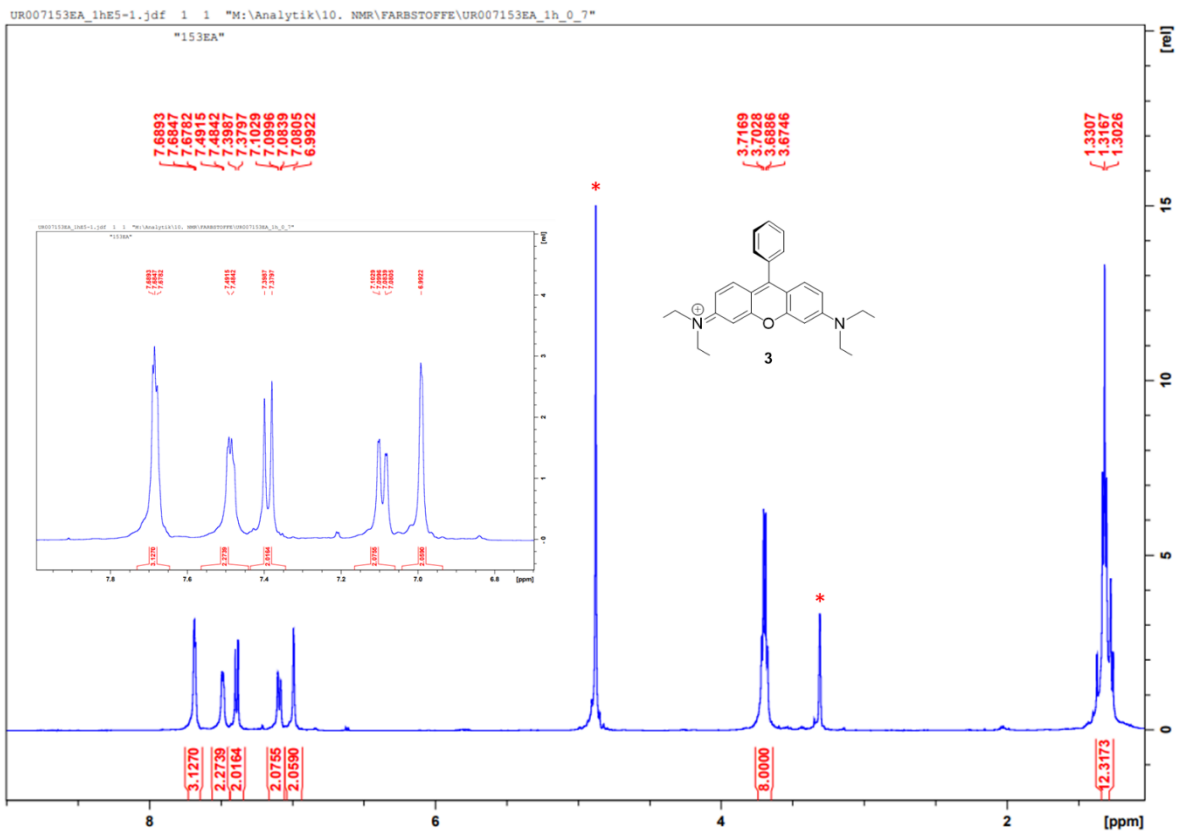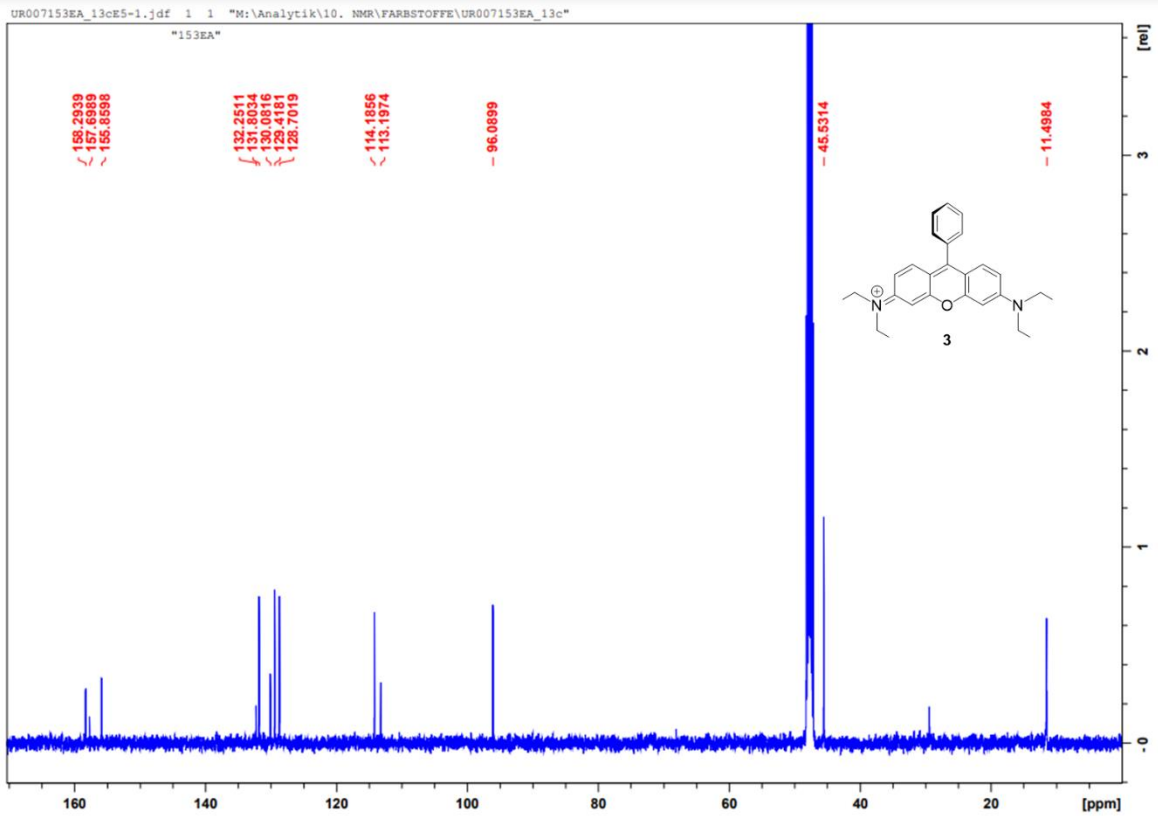

## Mass spectra

### Compound 1a

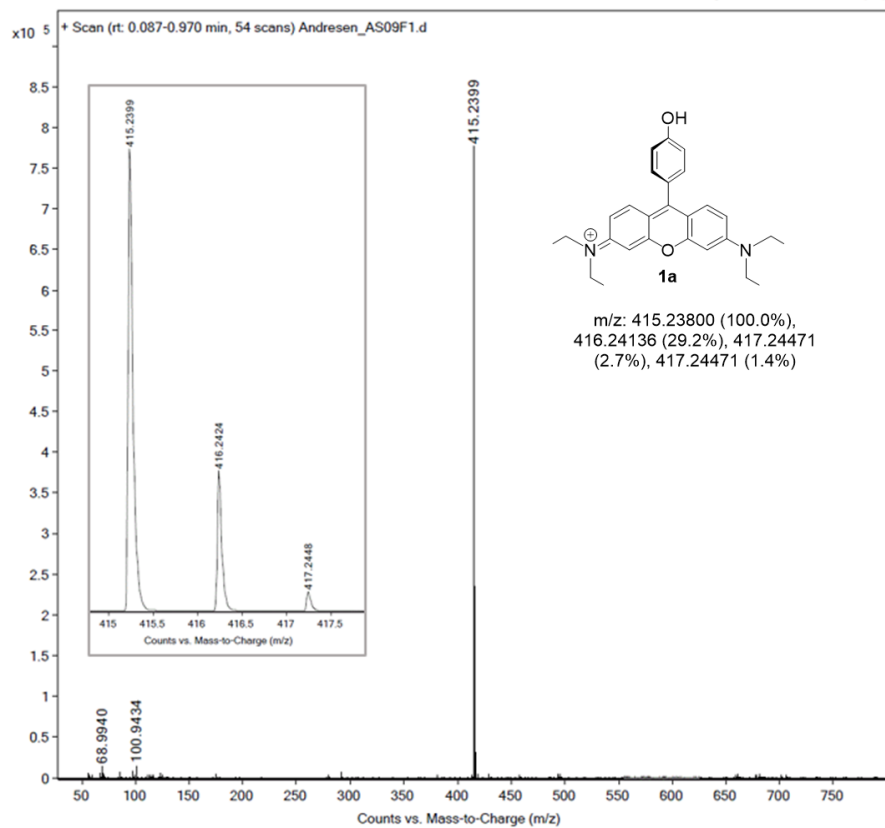

### Compound 1b

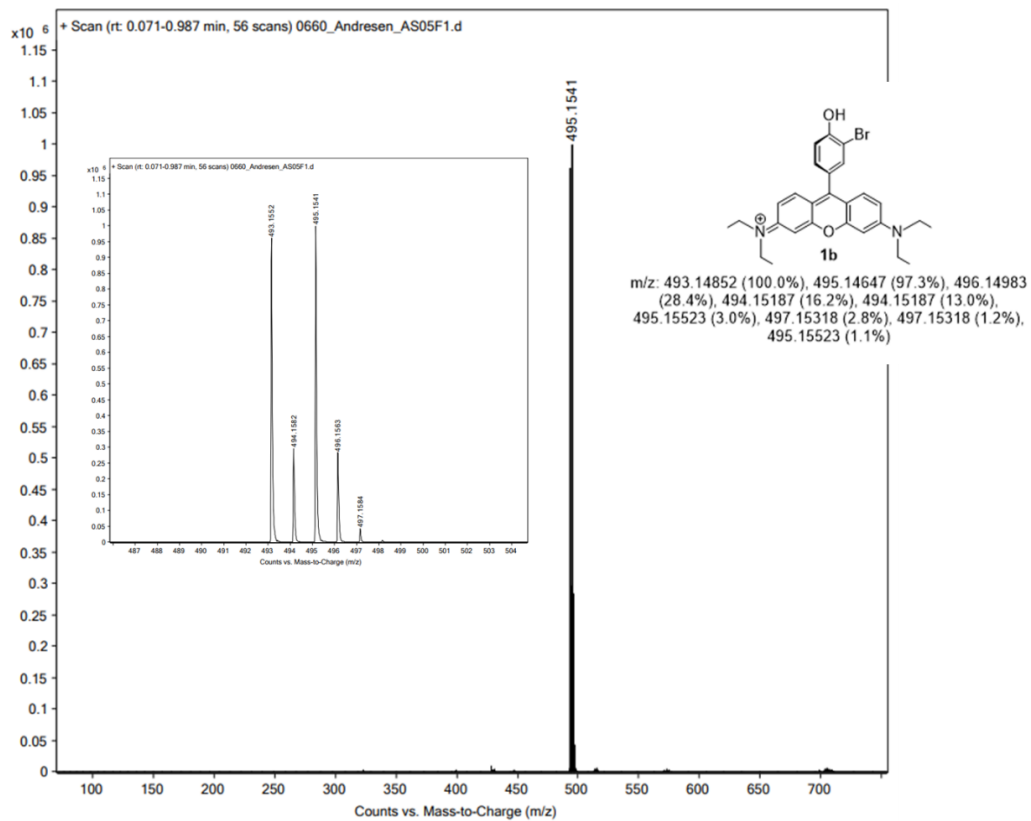



## Compound 1c

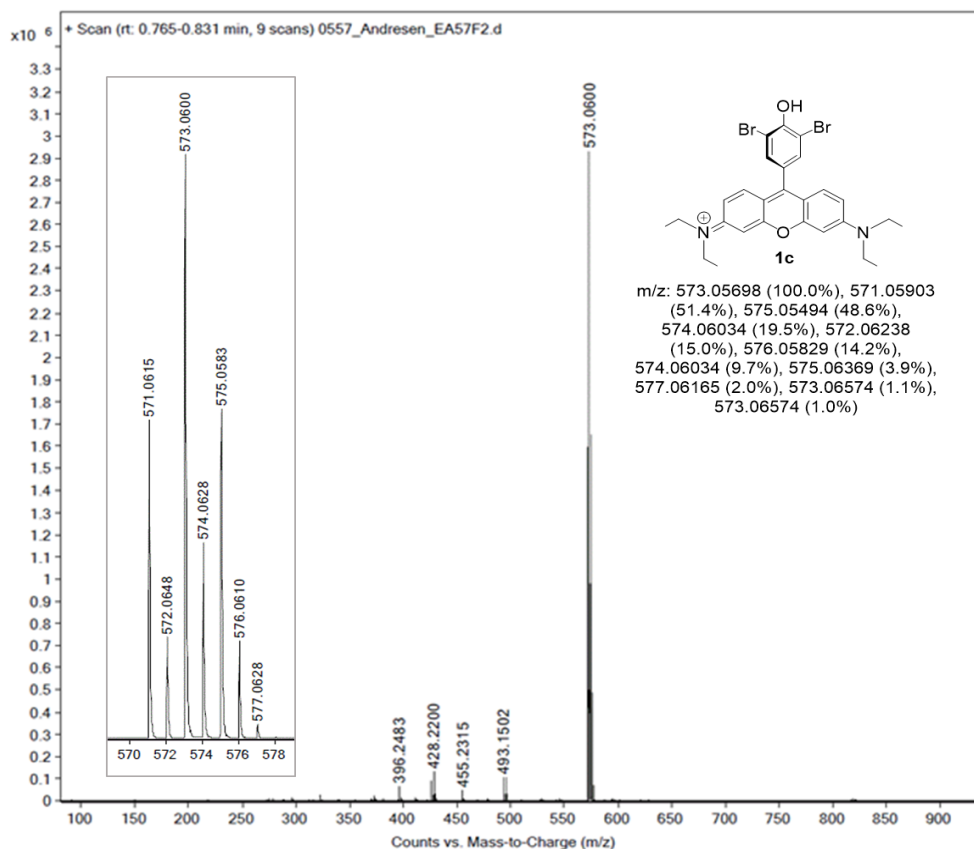

## Compound 1c\*

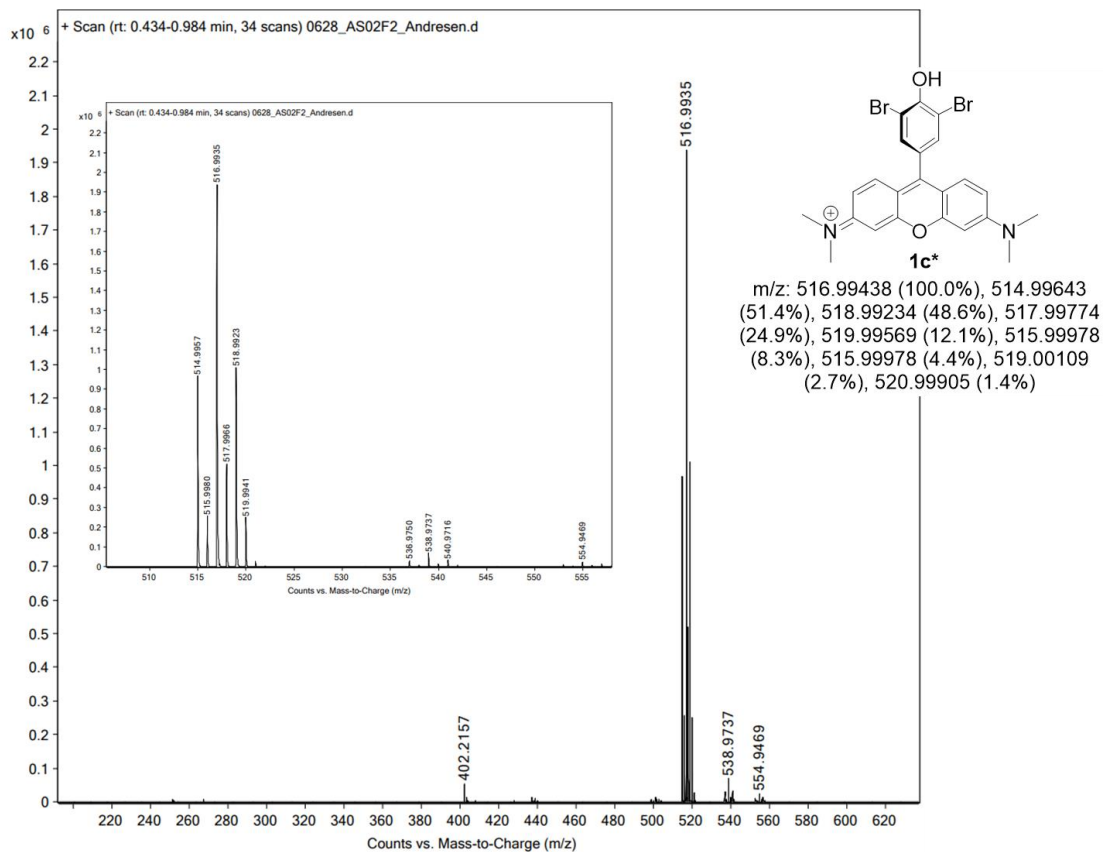

## Compound 1d

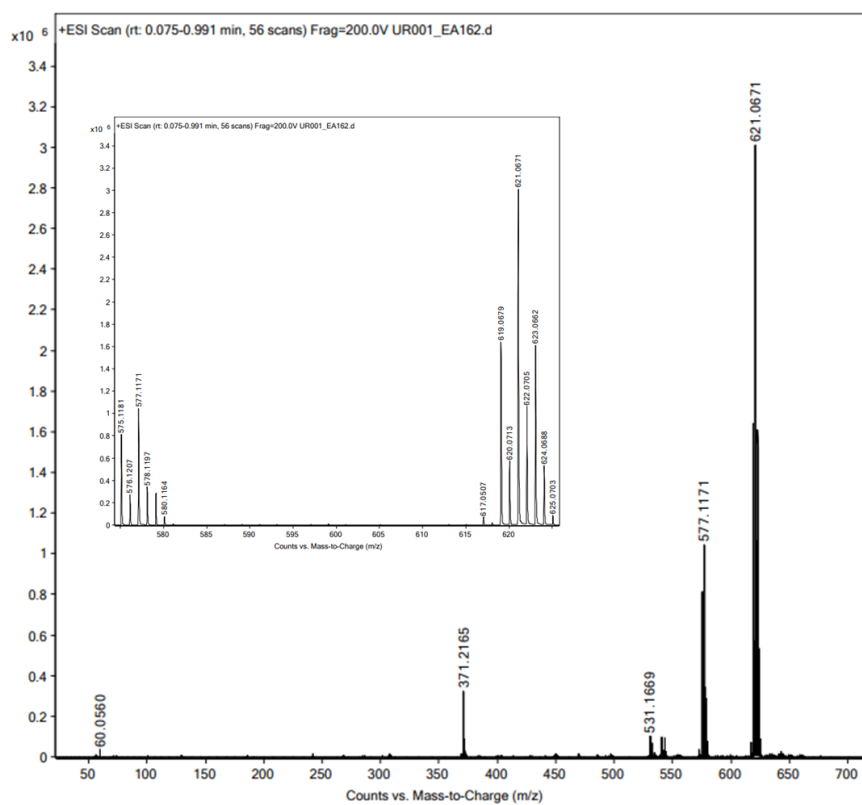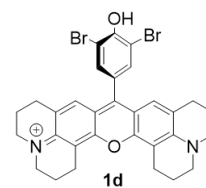

m/z: 621.05698 (100.0%), 619.05903 (51.4%), 623.05494 (48.6%), 622.06034 (33.5%), 620.06238 (16.7%), 624.05829 (16.3%), 623.06369 (2.8%), 625.06165 (2.6%), 623.06369 (2.6%), 621.06574 (1.5%), 621.06574 (1.3%)

## Compound 2a

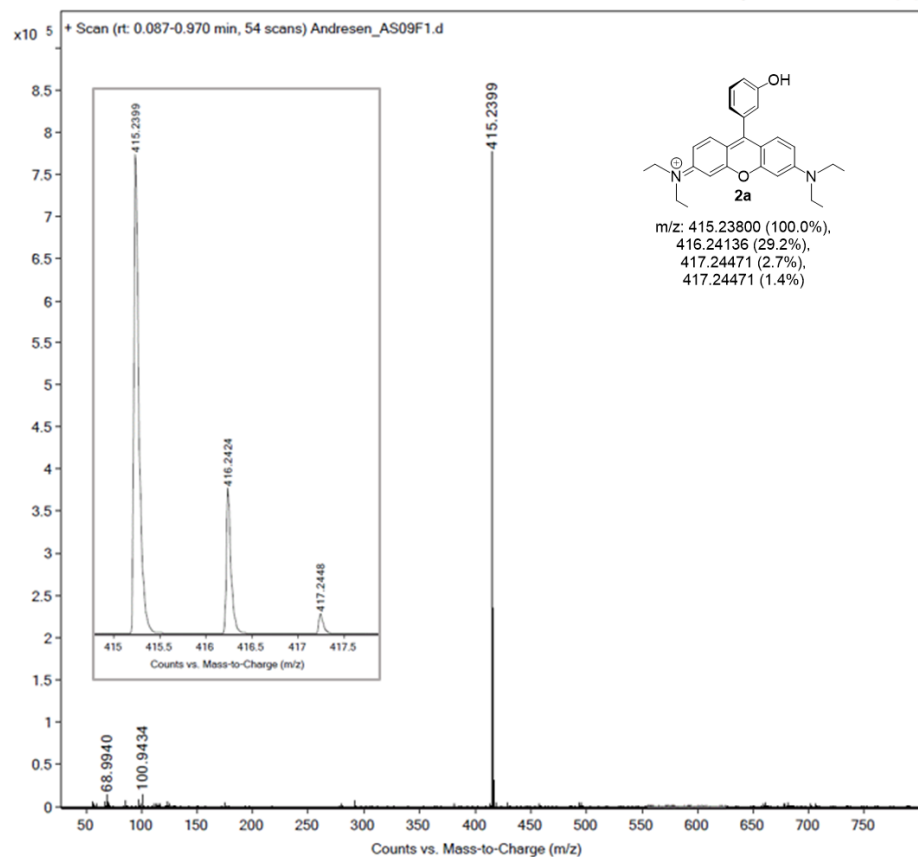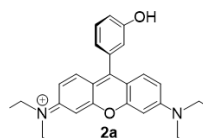

m/z: 415.23800 (100.0%), 416.24136 (29.2%), 417.24471 (2.7%), 417.24471 (1.4%)

## Compound 2b

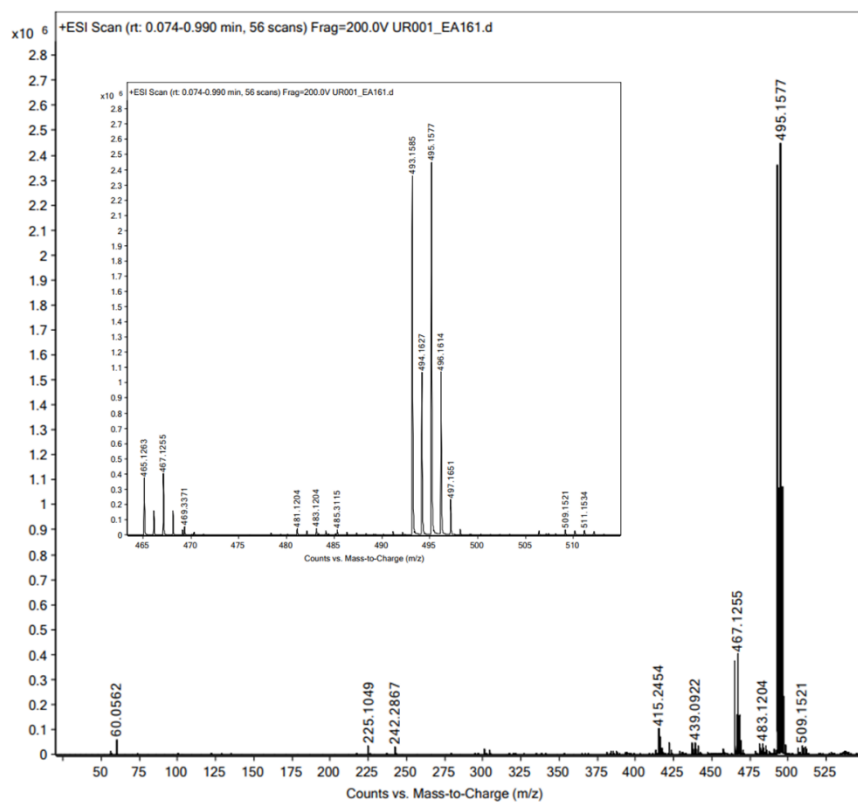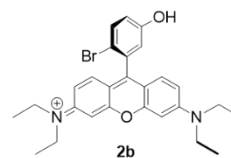

m/z: 493.14852 (100.0%), 495.14647 (97.3%),  
496.14983 (28.4%), 494.15187 (16.2%),  
494.15187 (13.0%), 495.15523 (3.0%),  
497.15318 (2.8%), 497.15318 (1.2%),  
495.15523 (1.1%)

## Compound 2c

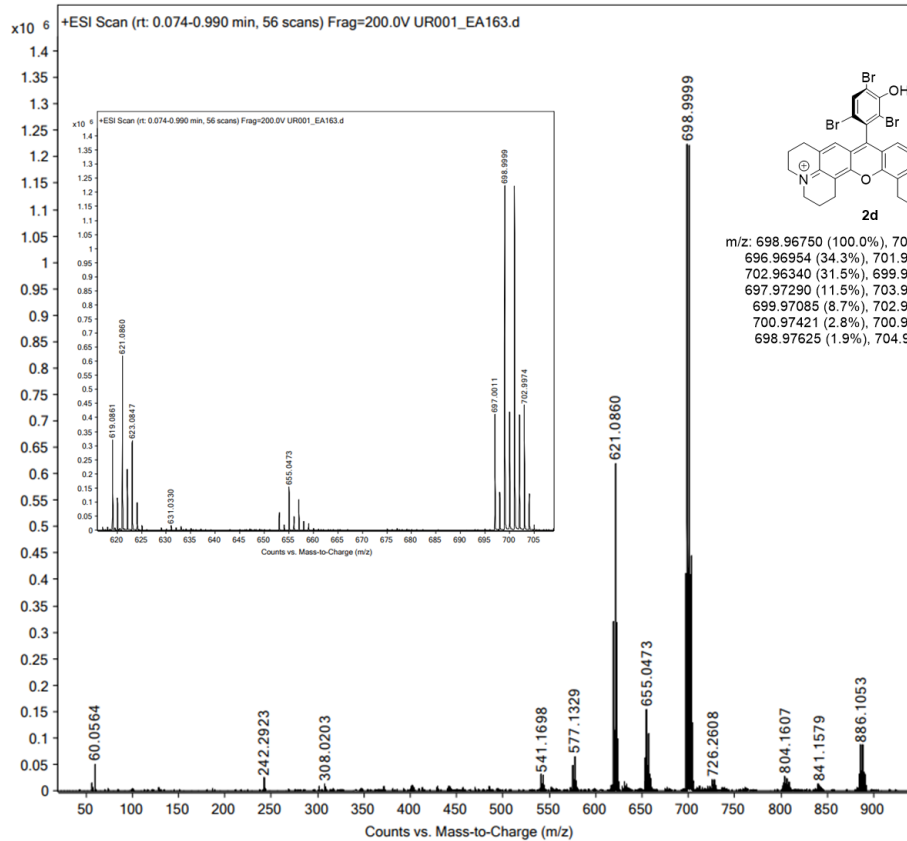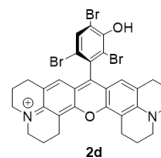

m/z: 698.96750 (100.0%), 700.96545 (97.3%),  
696.96954 (34.3%), 701.96880 (32.6%),  
702.96340 (31.5%), 699.97085 (24.9%),  
697.97290 (11.5%), 703.96676 (10.6%),  
699.97085 (8.7%), 702.97216 (4.8%),  
700.97421 (2.8%), 700.97421 (2.7%),  
698.97625 (1.9%), 704.97011 (1.7%)

## Compound 3

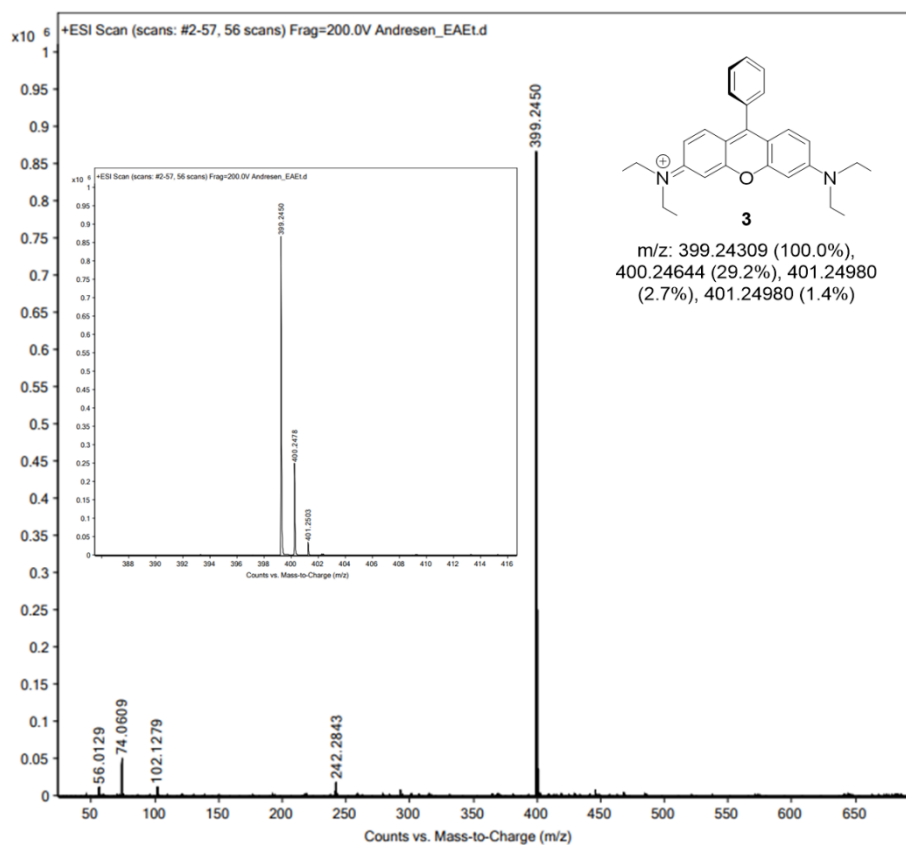

## 5. References:

1. S. Radunz, H. R. Tschiche, D. Moldenhauer and U. Resch-Genger, *Sensors and Actuators B: Chemical*, 2017, **251**, 490-494.
